# Supplementary material for: Proteomic analysis of Biomphalaria glabrata plasma proteins with binding affinity to those expressed by early developing larval Schistosoma mansoni
Source: PubMed Central journal article supplement (PMC5433772; doi:10.1371/journal.ppat.1006081), 2017-05-16
Supplement: ppat.1006081.s002.pdf [file ppat.1006081.s002.pdf]

**S1 Table. Summary of the number of unique peptide sequences and identified proteins recovered from NMRI and BS-90 *B. glabrata* plasma samples following elution from Mem and LTP affinity columns**

| <b>Mem (Sporocyst Membrane Proteins)</b>    |             |              |
|---------------------------------------------|-------------|--------------|
|                                             | <b>NMRI</b> | <b>BS-90</b> |
| # unique peptides                           | 564         | 480          |
| # protein ID                                | 58          | 51           |
| # unidentified proteins                     | 5           | 2            |
| <b>LTP (Larval Transformation Proteins)</b> |             |              |
|                                             | <b>NMRI</b> | <b>BS-90</b> |
| # unique peptides                           | 531         | 451          |
| # protein ID                                | 45          | 36           |
| # unidentified proteins                     | 3           | 1            |
