# Supplementary material for: Proteomic analysis of Biomphalaria glabrata plasma proteins with binding affinity to those expressed by early developing larval Schistosoma mansoni
Source: PubMed Central journal article supplement (PMC5433772; doi:10.1371/journal.ppat.1006081), 2017-05-16
Supplement: ppat.1006081.s003.pdf [file ppat.1006081.s003.pdf]

**S2 Table. Listing of predicted non-immune *B. glabrata* plasma proteins eluted from Mem and LTP affinity columns identified in VectorBase.**

| Protein Identification                                                                                                                                                                                                                        | Unique Peptide Count |     |      |     | VectorBase Scaffold                                                                                                                                                          |
|-----------------------------------------------------------------------------------------------------------------------------------------------------------------------------------------------------------------------------------------------|----------------------|-----|------|-----|------------------------------------------------------------------------------------------------------------------------------------------------------------------------------|
|                                                                                                                                                                                                                                               | BS-90                |     | NMRI |     |                                                                                                                                                                              |
|                                                                                                                                                                                                                                               | Mem                  | LTP | Mem  | LTP |                                                                                                                                                                              |
| <b>hemoglobin type 1</b> [ <i>Biomphalaria glabrata</i> ] ;<br>Sequence ID: CAJ44466.1; Identities: 100%                                                                                                                                      | 108                  | 128 | 143  | 128 | LGUN_random_Scaffold5741:1590-15334; minus strand                                                                                                                            |
| <b>PREDICTED: uncharacterized protein LOC106051763</b><br>[ <i>Biomphalaria glabrata</i> ]; Sequence ID: XP_013062423.1;<br>Identities: 100%<br><b>haemoglobin type 1</b> [ <i>B. glabrata</i> ]; Sequence ID:<br>CAJ44466.1; Identities: 76% | 12                   | 11  | 6    | 7   | LG17_random_Scaffold37: 105709-105474; 103671-103436; 101378-101137; 99539-99300; 91005-90767; 88372-88137; 23383-23148; 21154-20907; 19765-19530; 16554-16319; minus strand |
| <b>PREDICTED: uncharacterized protein LOC106051722</b><br>[ <i>Biomphalaria glabrata</i> ]; Sequence ID: XP_013062383.1<br>; Identities: 100%<br><b>haemoglobin type 1</b> [ <i>B. glabrata</i> ] Sequence ID:<br>CAJ44466.1; Identities: 87% | 10                   | 5   | 3    | 5   | LG17_random_Scaffold37:10,424-11,812; minus strand;<br>BGLB000834-PA                                                                                                         |
| <b>PREDICTED: uncharacterized protein LOC106077292</b><br>[ <i>Biomphalaria glabrata</i> ]; Sequence ID: XP_010393514.1;<br>Identities: 100%<br><b>haemoglobin type 1</b> [ <i>B. glabrata</i> ]; Sequence ID:<br>CAJ44466.1; Identities: 65% | 4                    | 6   | 6    | 5   | LGUN_random_Scaffold558: 30767-30464; 24999-24708;<br>20689-20454; 16076-15841; 13539-13304; 10586-10351; 7603-7362; 2289-2054; 1556-590; minus strand                       |
| <b>PREDICTED: uncharacterized protein LOC106078048</b><br>[ <i>Biomphalaria glabrata</i> ]; Sequence ID: XP_013094243.1;<br>Identities: 100%<br><b>haemoglobin type 1</b> [ <i>B. glabrata</i> ]; Sequence ID:<br>CAJ44466.1; Identities: 60% | 3                    | 6   | 8    | 8   | LGUN_random_Scaffold5741: 12584-12495; 11353-11244;<br>9616-9322; 8037-7419; minus strand                                                                                    |

|                                                                                                                                                                                                                                                          |    |     |     |     |                                                                                     |
|----------------------------------------------------------------------------------------------------------------------------------------------------------------------------------------------------------------------------------------------------------|----|-----|-----|-----|-------------------------------------------------------------------------------------|
| <b>PREDICTED: uncharacterized protein LOC106050210</b> ,<br>partial [ <i>Biomphalaria glabrata</i> ]; Sequence ID:<br>XP_013060614.1; Identities: 100%<br><b>haemoglobin type 1</b> [ <i>B. glabrata</i> ]; Sequence ID:<br>CAJ44466.1 ; Identities: 58% | 5  | 8   | 6   | 7   | LGUN_random_Scaffold7018: 3821-3568; 371-76; minus strand                           |
| <b>hemoglobin type 2</b> [ <i>Biomphalaria glabrata</i> ]<br>Sequence ID: CAJ44467.1; Identities: 100%                                                                                                                                                   | 81 | 102 | 108 | 108 | LGUN__random_Scaffold 8143:20,982-37,676; minus strand.<br>BGLB013430               |
| <b>PREDICTED: uncharacterized protein LOC106051916</b><br>[ <i>Biomphalaria glabrata</i> ]; Sequence ID: XP_013062584.1;<br>Identities: 100%<br><b>haemoglobin type 2</b> [ <i>B. glabrata</i> ]; Sequence ID:<br>CAJ44467.1; Identities: 98%            | 7  | 7   | 10  | 6   | LGUN_random_Scaffold8143:20982:37676:-1<br>gene:BGLB013430; 97%; plus strand        |
| <b>PREDICTED: uncharacterized protein LOC106050211</b> ,<br>partial [ <i>Biomphalaria glabrata</i> ]; Sequence<br>ID:XP_013060615.1 ; Identities: 100%<br><b>haemoglobin type 2</b> [ <i>B. glabrata</i> ];<br>Sequence ID: CAJ44467.1; Identities: 96%  | 3  | 3   | 3   | 2   | LGUN_random_Scaffold7018:4623:18026:1 gene:BGLB012730<br>87%; plus strand           |
| <b>PREDICTED: uncharacterized protein LOC106051747</b> ,<br>partial [ <i>Biomphalaria glabrata</i> ];Sequence ID:<br>XP_013062404.1; Identities: 100%<br><b>haemoglobin type 2</b> [ <i>B. glabrata</i> ];<br>Sequence ID: CAJ44467.1; Identities: 86%   | 6  | 7   | 6   | 4   | LGUN_random_Scaffold8143:20982:37676:-<br>1 gene:BGLB013430; 86%; plus strand       |
| <b>Chain A, acetylcholine-binding protein Type 2</b><br><b>(Bgachbp2)</b> [ <i>Biomphalaria glabrata</i> ]; Sequence ID:<br>4AOE_A ; Identities: 100%                                                                                                    | 10 | 15  | 9   | 17  | LG29_random_Scaffold14:635533-635416; 634747-634508;<br>632875-632202; minus strand |
| <b>PREDICTED: acetylcholine-binding protein-like isoform</b><br><b>X1</b> [ <i>Biomphalaria glabrata</i> ]; Sequence ID: XP_<br>013067426.1; Identities: 100%                                                                                            | 4  | 10  | 4   | 9   | LG29_random_Scaffold14:635533-635416; 634747-634508;<br>632875-632202; minus strand |
| <b>PREDICTED: actin-2-like</b> [ <i>Biomphalaria glabrata</i> ];<br>Sequence ID: XP_013083929.1; Identities: 100%                                                                                                                                        | 1  | 0   | 2   | 2   | LGUN_random_Scaffold29:432435:441953:1 gene:BGLB008299;<br>plus strand              |

|                                                                                                                                                                                                                                                                                  |    |   |    |   |                                                                                                                                                              |
|----------------------------------------------------------------------------------------------------------------------------------------------------------------------------------------------------------------------------------------------------------------------------------|----|---|----|---|--------------------------------------------------------------------------------------------------------------------------------------------------------------|
| <p><b>hypothetical protein LOTGIDRAFT_193218</b> [<i>Lottia gigantea</i>]; Sequence ID: XP_009060604.1; Identities: 100%</p> <p><b>PREDICTED: actin</b> [<i>Crassostrea brasiliana</i>]; Sequence ID: ANB49595.1; Identities: 99%</p>                                            | 5  | 2 | 7  | 4 | LGUN_random_Scaffold10528:12872:19460:1   gene:BGLB00391; plus strand                                                                                        |
| <p><b>PREDICTED: actin, alpha skeletal muscle</b> [<i>Biomphalaria glabrata</i>]; Sequence ID: XP_013073050.1; Identities: 95%</p>                                                                                                                                               | 2  | 0 | 1  | 0 | LGUN_random_Scaffold29:432435:441953:1   gene:BGLB008299 plus strand                                                                                         |
| <p><b>PREDICTED: tubulin alpha-1A chain-like, partial</b> [<i>Biomphalaria glabrata</i>]; Sequence ID: XP_013091074.1; Expect: 0.0; Identities: 100%</p>                                                                                                                         | 11 | 0 | 8  | 1 | LGUN_random_Scaffold5085:5474-17809:1   gene:BGLB010861 (100%); plus strand                                                                                  |
| <p><b>PREDICTED: tubulin alpha-3 chain-like, partial</b> [<i>Biomphalaria glabrata</i>]; Sequence ID: XP_013095645.1 ; Identities: 100%</p>                                                                                                                                      | 4  | 0 | 1  | 1 | LGUN_random_Scaffold6191:6220-9108:-1   gene:BGLB012164; plus strand                                                                                         |
| <p><b>PREDICTED: tubulin beta-4B chain-like</b> [<i>Biomphalaria glabrata</i>]; Sequence ID: XP_013097130.1; Identities: 100%</p>                                                                                                                                                | 2  | 0 | 1  | 0 | LGUN_random_Scaffold6940:15330-18731:1   gene:BGLB012690 (100%); plus strand                                                                                 |
| <p><b>PREDICTED: tubulin beta-4B chain-like</b> [<i>Biomphalaria glabrata</i>]; Sequence ID: XP_013085141.1; Identities: 100%</p>                                                                                                                                                | 16 | 0 | 13 | 0 | LGUN_random_Scaffold3175:23130:28038:1   gene:BGLB008716 (100%); plus strand                                                                                 |
| <p><b>PREDICTED: collagen alpha-1(XII) chain-like, partial</b> [<i>Biomphalaria glabrata</i>]; Sequence ID: XP_013088320.1 ; Identities: 100%</p>                                                                                                                                | 6  | 0 | 5  | 2 | LGUN_random_Scaffold409: 210568-210376; 208117-207998; 203161-202925; 200670-200506; 198286-198104; 195116 194857; minus strand                              |
| <p><b>PREDICTED: collagen alpha-5(VI) chain-like</b> [<i>Biomphalaria glabrata</i>]; Sequence ID: XP_013079619.1 ; Identities: 100%</p>                                                                                                                                          | 0  | 0 | 4  | 7 | LGUN_random_Scaffold2059:1: 17949-18112; 19250-19482; 21462-21627; 22126-22308; 31136-31259; 33936-34068; 36698-36930; 39753-39921; 41246-41428; plus strand |
| <p><b>PREDICTED: uncharacterized protein LOC106073418</b> [<i>Biomphalaria glabrata</i>]; Sequence ID: XP_013089410.1; Identities: 100%</p> <p><b>PREDICTED: collagen alpha-1(IX) chain-like, partial</b> [<i>B. glabrata</i>]; Sequence ID: XP_013071005.1; Identities: 70%</p> | 0  | 2 | 0  | 2 | LGUN_random_Scaffold105369: 585-5; minus strand                                                                                                              |

|                                                                                                                                                           |   |    |   |    |                                                                                                                                                                                                                           |
|-----------------------------------------------------------------------------------------------------------------------------------------------------------|---|----|---|----|---------------------------------------------------------------------------------------------------------------------------------------------------------------------------------------------------------------------------|
| <b>PREDICTED: balbiani ring protein 3-like</b> [ <i>Biomphalaria glabrata</i> ]; Sequence ID: XP_013096729.1 ; Identities: 100%                           | 8 | 10 | 9 | 13 | LGUN_random_Scaffold675: 24344-21090; minus strand                                                                                                                                                                        |
| <b>PREDICTED: apolipoprotein-like isoform X1</b> [ <i>Biomphalaria glabrata</i> ]; Sequence ID: XP_013082155.1 ; Identities: 100%                         | 6 | 0  | 9 | 8  | LG4_random_Scaffold2455: 41449-41188; 39683-39359; 36375-36110; 33330-33059; 32080-31815; 30252-25604; 18006-17780; 13866-13496; 6868-6117; minus strand                                                                  |
| <b>PREDICTED: alpha-amylase-like</b> [ <i>Biomphalaria glabrata</i> ]; Sequence ID: XP_013062082.1 ; Identities: 100%                                     | 2 | 2  | 5 | 2  | LGUN_random_Scaffold784:118162-121490:-1 gene:BGLB013250                                                                                                                                                                  |
| <b>PREDICTED: ATP synthase subunit alpha, mitochondrial-like</b> [ <i>Biomphalaria glabrata</i> ]; Sequence ID: XP_013081788.1 ; Identities: 100%         | 4 | 0  | 3 | 0  | LGUN_random_Scaffold2464:29420-32015:1 gene:BGLB007667                                                                                                                                                                    |
| <b>PREDICTED: ATP synthase subunit beta, mitochondrial-like</b> [ <i>Biomphalaria glabrata</i> ]; Sequence ID: XP_013070512.1; Identities: 100%           | 6 | 0  | 6 | 0  | LGUN_random_Scaffold10059:2817-7549:-1 gene:BGLB003755                                                                                                                                                                    |
| <b>PREDICTED: sodium/potassium-transporting ATPase subunit alpha-like</b> [ <i>Biomphalaria glabrata</i> ]; Sequence ID: XP_013071165.1; Identities: 100% | 5 | 0  | 4 | 0  | LGUN_random_Scaffold107:64347-71294:-1 gene:BGLB004031                                                                                                                                                                    |
| <b>PREDICTED: elongation factor 1-alpha</b> [ <i>Biomphalaria glabrata</i> ]; Sequence ID: XP_013067348.1; Identities: 100%                               | 2 | 0  | 3 | 2  | LG28i_random_Scaffold9449:4199-6514:-1 gene:BGLB001639                                                                                                                                                                    |
| <b>PREDICTED: ubiquitin-40S ribosomal protein S27a</b> [ <i>Biomphalaria glabrata</i> ]; Sequence ID: XP_013063486.1; Identities: 100%                    | 3 | 1  | 1 | 1  | LGUN_random_Scaffold868:32636:33553:-1 gene:BGLB013769<br>LGUN_random_Scaffold868:1:102120:135986-35764; 32796-32596                                                                                                      |
| <b>PREDICTED: tyrosine-protein phosphatase non-receptor type 23-like</b> [ <i>Biomphalaria glabrata</i> ]; Sequence ID: XP_013069839.1; Identities: 100%  | 1 | 2  | 1 | 1  | LG9i_random_Scaffold325:325130:325976:1 gene:BGLB003636<br>LG9i_random_Scaffold325: 326111-326271; 325799-325962; 337767-337976; 339268-339428; 343490-343683; 346069-348652; 351757-351981; 358275-358477; 358667-360177 |

|                                                                                                                                                |   |   |   |   |                                                                                                                                                           |
|------------------------------------------------------------------------------------------------------------------------------------------------|---|---|---|---|-----------------------------------------------------------------------------------------------------------------------------------------------------------|
| <b>Histone H4</b> [ <i>Larimichthys crocea</i> ]; Sequence ID: KKF20647.1 ; Identities: 100%                                                   | 4 | 0 | 4 | 0 | LGUN_random_Scaffold3683:39221:39397:1 gene:BGLB009366                                                                                                    |
| <b>PREDICTED: adenosine deaminase CECR1-like, partial</b> [ <i>Biomphalaria glabrata</i> ]; Sequence ID: XP_013061189.1; Identities: 100%      | 0 | 0 | 3 | 0 | LGUN_random_Scaffold7376:1:18597:1: 5703-5853; 6641-6818; 8965-9097; 13395-13527; 16836-16913 plus strand                                                 |
| <b>PREDICTED: clathrin heavy chain 1</b> [ <i>Biomphalaria glabrata</i> ]; Sequence ID: XP_013079752.1; Identities: 98%                        | 3 | 0 | 0 | 0 | LGUN_random_Scaffold2072:39208:58064:-1 gene:BGLB007033                                                                                                   |
| <b>PREDICTED: V-type proton ATPase catalytic subunit A-like</b> [ <i>Biomphalaria glabrata</i> ]; Sequence ID: XP_013086122.1; Identities: 96% | 2 | 0 | 0 | 0 | LGUN_random_Scaffold3436:56868:63955:1 gene:BGLB009092                                                                                                    |
| <b>PREDICTED: V-type proton ATPase subunit B</b> [ <i>Biomphalaria glabrata</i> ]; Sequence ID: XP_013087752.1; Identities: 99.8%              | 2 | 0 | 0 | 0 | LG8_random_Scaffold135:164139:169688:1 gene:BGLB003477                                                                                                    |
| <b>PREDICTED: putative tyrosinase-like protein tyr-1</b> [ <i>Biomphalaria glabrata</i> ]; Sequence ID: XP_013065893.1; Identities: 100%       | 2 | 0 | 0 | 0 | LG20i_random_Scaffold3077:1:54679:1: 29371-29078; 27996-27830; 23386-23126; 22813-22597; 22259- 22108; 20827-20517; 19464-19267; 18992-18836; 18366-18277 |
| <b>PREDICTED: ovalbumin-like isoform X2</b> [ <i>Biomphalaria glabrata</i> ]; Sequence ID: XP_013088530.1; Identities: 100%                    | 2 | 0 | 1 | 0 | LGUN_random_Scaffold4153:1:27349:1: 18675-18513; 17521-17299; 5618-5480; 4454-4305; 2924-2702                                                             |
