# Supplementary material for: Proteomic analysis of Biomphalaria glabrata plasma proteins with binding affinity to those expressed by early developing larval Schistosoma mansoni
Source: PubMed Central journal article supplement (PMC5433772; doi:10.1371/journal.ppat.1006081), 2017-05-16
Supplement: ppat.1006081.s004.pdf [file ppat.1006081.s004.pdf]

**S3 Table. Protein sequences, identified domains and genomic locations in VectorBase of NMRI and BS-90 *Biomphalaria glabrata* VlgL domain-containing plasma proteins eluted from sporocyst membrane-enriched (Mem) affinity columns.**

| Protein ID                                                                                                                                                                                                                                                                                               | Scaffold No.                                                                                                                                                                                                                                                                                                                                                | Predicted Protein Sequence                                                                                                                                                                                                                                                                                                                                                                                                                                                                                                                                                                                                                                                                                                                                                                                                                                                               |
|----------------------------------------------------------------------------------------------------------------------------------------------------------------------------------------------------------------------------------------------------------------------------------------------------------|-------------------------------------------------------------------------------------------------------------------------------------------------------------------------------------------------------------------------------------------------------------------------------------------------------------------------------------------------------------|------------------------------------------------------------------------------------------------------------------------------------------------------------------------------------------------------------------------------------------------------------------------------------------------------------------------------------------------------------------------------------------------------------------------------------------------------------------------------------------------------------------------------------------------------------------------------------------------------------------------------------------------------------------------------------------------------------------------------------------------------------------------------------------------------------------------------------------------------------------------------------------|
| <p><b>FREP 2.28</b> [<i>Biomphalaria glabrata</i>] (100%); Sequence ID: ADK11410</p> <p><u>Domains:</u><br/>                     -Signal peptide: 1-20<br/>                     -lg: 38-148<br/>                     -FBG: 181-382</p>                                                                   | <p>500-1158:<br/>                     LGUN_random_Scaffold563550:<br/>                     640-1300; rev. frame; 1994bp<br/>                     LGUN_random_Scaffold9301:<br/>                     368-1028; 12407bp<br/>                     199-502:<br/>                     LGUN_random_Scaffold534902:<br/>                     1310-1613; 1684bp</p> | <p>MASLPLRLVLLVSMVTLIRSSSWLNFTGNSETIRELIQPLKLTCTFQISKNDSENDSQVLFMSIYHETKRVIASISKYQPVAT<br/>                     SLYPSVTKVQGGQIYHSNESKDSYLQVTWTHPKLSESGKYFCLAHAWNSTSQNSVFDADITVNVIKSSTDDLAVALSIIQD<br/>                     RLDKDGVDSIQISRASPTLPESCRDVISSDRVVVTLASGLKVMCDTKTDGGGWIIIFQRINGYVDFYRGWKEYRDGFG<br/>                     DYDIGEFYLGNEINIFKLTSSKKYDLRIDLEFNNTKYFAFYTRFEILGEQDYKQIGGYSNAGDALTNIHNDKFFSTYDKD<br/>                     NDLGTSGSCAVTHKGAWWYRDCYDSSLNGKWGSDRINWSKLTGITKSVTFTEMKIREIELN</p>                                                                                                                                                                                                                                                                                                                                                                           |
| <p><b>FREP 3-2 precursor</b> [<i>Biomphalaria glabrata</i>] (100%); Sequence ID: AAK28656</p> <p><u>Domains:</u><br/>                     -Signal peptide: 1-18<br/>                     -lg: 28-134 / 183-301<br/>                     -Coiled coil: 314-382<br/>                     -FBG: 451-655</p> | <p>LG3_random_Scaffold2841:<br/>                     18324:26062; BGLB000204;<br/>                     253aa/ 655aa; 65764bp</p>                                                                                                                                                                                                                            | <p>MARLFLFILCVFVSLAGSELVIDVQPNVISPEITPQLVINCSITNNEVQTLDLIKSLTSLRYNETIREFDELIALDSLTLNLKQ<br/>                     FVRFKYSQISFGNRYITLILHNPTQFDARIYKCNATGTNSEGANISLFAKKAVEYETNSTALIEIRRIKKDENYCSFKKDDLS<br/>                     DSKQRSRVYFSGSSDIKERIEPLTKCTFQVLKTDQNETSRLQSLYLHESKGVIAVYVNDQPVVTSLQGSNIQDVEGEIYD<br/>                     NAIKDSYLQVTSNLSKHSSESGKYFCEAHNKYSEGRIDKSSNMLTITVERPTFDDLVEAMHKLFTQVDGAKESLKAINQNI<br/>                     KNINKDLDFEQNITSIKQEVIRNQNNIQLSEDLNIKEQNLTSIKADLSTKQQTFLNIKEDVILNQIIHKIKQDLNNTYRHN<br/>                     MSNIEEHLEVILTNLSTASIKVKNQTDGSGKMSYPPRKRCDVNSTDERVVVTLTSLGLKVMCDTKTDGGGWIIIFQRIN<br/>                     GNVDYFYGWKEYRDGFGDYNIGEFYLGNEINIMLTSTGQYNLRIDLKYNKAFFAQYSGFKILSEKEYKLNIGAYSGNS<br/>                     GDNFSSHNAFFTTFRDNDDEYSNCAVDYTGAWWYHSSCLNCLNGKWGSSDFAKGVNWDLSRFSSVSFTEM<br/>                     KIREI</p> |
| <p><b>PREDICTED: Ficolin-2-like</b> [<i>Biomphalaria glabrata</i>] (100%); Sequence ID: XP_013071685</p> <p><u>Domains:</u><br/>                     -lg: none<br/>                     -Coiled coil: 12-53<br/>                     -FBG: 71-280</p>                                                    | <p>LGUN_random_Scaffold11134:<br/>                     377-790; 2673-3506</p>                                                                                                                                                                                                                                                                               | <p>MLIVTVATATFDDLKVIQKLMKQADEDEKEIQENKQKIKNIQEDFDTRQQNLSPFKDILVNGKKDYKEMNTSDSILPD<br/>                     RPCNVNSTKRRLLVLNLASGLKVMCDTMTDGGGWIIIQRRIKGMVDFNRDWQEYRDGFGDYNIGEFYLGNEINIKLTS<br/>                     GNYELRVDLEINYSFYALYSKFQIMNESNKYKLIKISGYLGNATDSLAWHDNLFSTYKDNKNNIPNCLFKYPGGWW<br/>                     FGAGHGSLNGLVWRSRFRNQGINWYGLTGYKKSAYFSEMIREKY</p>                                                                                                                                                                                                                                                                                                                                                                                                                                                                                                                |

|                                                                                                                                                                                                                                                                                                                                                                                                |                                                                                                                                                                                                                                                                         |                                                                                                                                                                                                                                                                                                                                                                                                                                                                                                                                                                                                                                                                                                                     |
|------------------------------------------------------------------------------------------------------------------------------------------------------------------------------------------------------------------------------------------------------------------------------------------------------------------------------------------------------------------------------------------------|-------------------------------------------------------------------------------------------------------------------------------------------------------------------------------------------------------------------------------------------------------------------------|---------------------------------------------------------------------------------------------------------------------------------------------------------------------------------------------------------------------------------------------------------------------------------------------------------------------------------------------------------------------------------------------------------------------------------------------------------------------------------------------------------------------------------------------------------------------------------------------------------------------------------------------------------------------------------------------------------------------|
| <p><b>PREDICTED: Fibrinogen C domain-containing protein</b> [<i>Biomphalaria glabrata</i>] (50%); XP_013072469.1</p>                                                                                                                                                                                                                                                                           |                                                                                                                                                                                                                                                                         |                                                                                                                                                                                                                                                                                                                                                                                                                                                                                                                                                                                                                                                                                                                     |
| <p><b>PREDICTED: Angiopoietin-4-like</b> [<i>Biomphalaria glabrata</i>] (100%); Sequence ID: XP_013069966</p> <p><u>Domains:</u><br/>         -lg: none<br/>         -Coiled coil: 97-192<br/>         -Internal repeat: 202-286/ 286-363<br/>         -FBG: 403-563</p> <p><b>PREDICTED: Fibrinogen C domain-containing protein</b> [<i>Biomphalaria glabrata</i>] (47% ); XP_013093995.1</p> | <p>LG3_random_Scaffold99: 2047-3202; 5313-5785</p>                                                                                                                                                                                                                      | <p>MYIFHETNGVIATINKGQTVVTAIQEVGSNNVKGELSDEKLHESYLQVTWRNLRSSDSGKYFCGAHVIGSDGRAERLNE MVTIQVK<b>LPTFEDLVNVIQK</b>LLIQANDDREILQDNKQNIKSQNELRNNQDNVIKMYKDLNHEQNFIRIKKDLDSNQQ NIKIINQDLDNQKQNIIR<b>INTDLSKEQQFTR</b>FNKDLDSKQQDIIRIDKDLNATEHNITRINKDIDSKQQDIIRIDKDLNATE HNITRINKDIDSKQQDIIRIDKDLNATKHNITRINKDIDSKQQDIIRIDKDLNATKHNITRINKDLDSKQQNIIRIDKDLNATK HNITRINKNLDKQQDIISIKQDLESSKDFNEHRQNISIFKDILDVTIYNLSSSLTDVKQELTKELSDGKICISGHIHAASCRN VRSSDITYVFLPSGLKVMCDTK<b>TDGGGWIIFQR</b>RINGKVNFYRGWEEYRGGFGDFDIGEYFLGNENIFK<b>LTSTGQYDLRID</b>LEFKNTKYFAQYEDFKVLSETEKYKLIQGDYSGYAGDDLSPHNNMFFSTFDRDNDGQKISTVHKVIKNQENLISD SK</p>                                                                                        |
| <p><b>PREDICTED: Fibrinogen C domain-containing protein</b> [<i>Biomphalaria glabrata</i>] (100%); Sequence ID: XP_013072469</p> <p><u>Domains:</u><br/>         -Signal peptide: 1-19<br/>         -lg: 27-141<br/>         -Coiled coil: 383-450<br/>         -FBG: 452-627</p>                                                                                                              | <p>LGUN_random_Scaffold1199: 57142-57604;61307-61835; 65995-66891</p>                                                                                                                                                                                                   | <p>MAHMHVHLTLCVVLVLSSELIIDVDPDIISLEITPQLVINCSITNNKQVHLDVMNSLTLRSYDKTIRDFIALITLDSSTLNLK QLTKFNSQVSFGNLYLALTLHYPTQFDKAVYRCSVNGNANGTDVLSAKKGVETNSTALIEEIRRLKDEDTYKCSF KKTDRPGSRVHFFASSEIIEKRIEPLTLNCSFQVSYLFIHFHNVFNNMSTPEAYETVEHILYEYRMLRNTIEDTTSFETERTG AWLGLTLYGDKRTLQNTGRDLVETNGVIATINKGQPVLTIIHGHSNSRNAKGEIFDNELKDSYLQVTLNQLQFSSESGKY FCEAHVKRSQGGVERLNKMLAISVLSPTFEDLVKIEKVLKRSDEDNIRIRENGQTLRNIQEDSDTKEKNIKSIEEDLNTKQ QNIISLKEDFNAFQRTMNTFREKLEVISANVSKIERERTEDKEIASCREVKTREER<b>VVVTLASGLKVMCDTKTDGGGWIIFQR</b>RTYGIIVDFYRSWQEYRDGFGDVSIGEFYLGNEHIYNTSSAKYDLRIDIKYNRNSYYAQYSDFQILSEKDKYKLGAYS GNAGDLSYHNNMFFSTYDKDNDLYGSNCATNYLSAWWYNSCHNSNLNGQWGSK<b>VNSNGVIWNTLTK</b>GESASFTEI KIREK</p>                     |
| <p><b>Galectin-related protein precursor (GREP)</b> [<i>Biomphalaria glabrata</i>] (100%); SequenceID: AKS26835.1</p> <p><u>Domains:</u><br/>         Signal peptide: 1-20<br/>         lg: 28-133 /208-325<br/>         -Gal-binding: 473-610</p>                                                                                                                                             | <p>LGUN_random_Scaffold_18083: 2985-3023; 2124-2167; 2738-2840; 1688-2124; 624-705; 123-183;<br/>         LGUN_random_Scaffold_47310: 864-1192;<br/>         LGUN_random_Scaffold_12074 1:407-476;<br/>         LGUN_random_Scaffold_5606: 17851-18203; 15817-16198</p> | <p>MKRLLPLLLLTSLLQGSLTELIQVNPVTISPGLTPKLTVNCISNESVAELNAIQLSMSRYNETSK<b>TFDVLTYIDKETLSLK</b> QIVELKGAQISFGNLFILLTIPSPSQYDCQTYSCIANGYNKFNGNDSISTKVKVESRTNITEYIKEINRLKK<b>LEANSIMEDNVP LKNI</b>EKLILANMNIQMCSLTTNKTSEDIEK<b>ATLHFSVNSK</b>TIKEFLEPMIMKCTFQVSKNNASQNLTVHYMYIR<b>HETNG V</b>LATISR<b>DQ</b>QVGISQDTSLSQVQGLSDQDFNISYLQVIWIKPSPSQSGKY<b>YVCGANIVNQEGQLEK</b>LK<b>ASLEITIEK</b>TSLED LVPIVIDLLAERTKVRHILEASMKEVIEIKQQVRSVIENVRLINQNSSTSFLVFSNIEFSGCKPNHTSQIKTLAINCLRNVC AALMCAKDLTCTPCDRSAISGLR<b>FPDHGSEMYLKRSLVLSQVEKRL</b>PPVLVLSIAVPSGLR<b>AEDLIYFR</b>VTLLKY<b>DNFYID LYEDNYNIN</b>YQFRARCDQCSIKGDCSESDCKSKFVTIGSKTSGFWSRSFVTRDYPFVLNEEFEMYLIIHQSDVDVYIKD KLFANIKTPRKPEDVVR<b>VIQFGGTIVLHEL</b>SL</p> |

|                                                                                                                                                                                                                                                                                                                                                       |                                                                                                                                                                                                                                            |                                                                                                                                                                                                                                                                                                                                                                                                        |
|-------------------------------------------------------------------------------------------------------------------------------------------------------------------------------------------------------------------------------------------------------------------------------------------------------------------------------------------------------|--------------------------------------------------------------------------------------------------------------------------------------------------------------------------------------------------------------------------------------------|--------------------------------------------------------------------------------------------------------------------------------------------------------------------------------------------------------------------------------------------------------------------------------------------------------------------------------------------------------------------------------------------------------|
| <p><b>PREDICTED: Uncharacterized protein LOC106063810, partial</b><br/>[<i>Biomphalaria glabrata</i>] (100%);<br/>Sequence ID: XP_013077728</p> <p><u>Domains:</u><br/>-lg: 1-73<br/>-lectin domain: none (N-term seq only)</p> <p><b>Galectin-related protein precursor (GREP)</b> [<i>Biomphalaria glabrata</i>] (96%); Sequence ID: AKS26835.1</p> | <p>LGUN_random_Scaffold18083: 1688-2120; 624-705; 75-186;</p>                                                                                                                                                                              | <p>MSLYNETSKT<b>FDVLYTIDKETLSLK</b>QIVELKGVQISFGNMFILLTIPSPSQYDCQTYSCIANGYNKYGNND SISTKVKVESRT NITEYIKEINRLKK<b>LEANSIMEDNVPLKNIEK</b>LILANMNMQMCSLTNTKTSIEDLIEK<b>ATLHFSVNSKTIKELLQPMIMKCTFQ</b> VSKNDASQNFTVHYMYIRHGNKDTTIHWRIQEGGG</p>                                                                                                                                                              |
| <p><b>C-type lectin-related protein 2 precursor, partial (CREP2)</b><br/>[<i>Biomphalaria glabrata</i>] (98.5%);<br/>Sequence ID: AKS26832</p> <p><u>Domains:</u><br/>-lg-like: 15-132<br/>-Coiled coil: 142-174<br/>-C-lect: 196-325</p>                                                                                                             | <p>LGUN_random_Scaffold35213: 1403 -1468<br/>LGUN_random_Scaffold34937: 746 -1051 (71.9%)<br/>LGUN_random_Scaffold205317: 1 -272 (98.2%)<br/>LGUN_random_Scaffold46202: 1045-1228 (100%)<br/>LGUN_random_Scaffold113935: 1-178 (97.8%)</p> | <p>FRELDLGSRLFTGNSETIKEIFEPLILSCSFQVAKHDVKENGNVILMYIFQETKGVIIATISK<b>GQPFAYSTEPR</b>HTFAQGNIG DEKLNKSYLQVTRKNPNSLESQYFCLAHVRDSAGKDKVFHASIKINIEK<b>SNSDDLVPALGR</b>VLERLDRIERQEATEQKIV DAQEDFNIQIGNLSSVLDQEKPKKEEDNVLCNAGFHKITDQGQISACVWVSNVSMNYIQARDDCKEKGALLTLKTQEK FTLLHKNDPGRYLWIGLTDRLIEDIFKWDDDNSICNPLCRGRLFSTGEPNDSGGEEDCVVYYPTRMKLNDNCCGSTNHY MCEHPI</p>                                        |
| <p><b>C-type lectin-related protein 3 precursor, partial (CREP3)</b><br/>[<i>Biomphalaria glabrata</i>] (100%);<br/>Sequence ID: AKS26833</p> <p><u>Domains:</u><br/>-Signal peptide: 1-19<br/>-lg: 29-145<br/>-Coiled-coil: 226-251<br/>-C-lect: 261-360</p>                                                                                         | <p>LG3_random_Scaffold2051: 76877-77044; 74469-74550;<br/>LGUN_random_Scaffold38320: 919-1386;<br/>LG3_random_Scaffold2051: 66872-67025; 63650-63835</p>                                                                                   | <p>MKTLHLVLAALCAFIVTVLCSPTVFTANSETVKEQFQPLILSCSVKVSQNEPIQDANVHLLYLHETKRIIARISKDQPVGTS QNPGSIQVQGGQINENKAMHSYLQVTWTPKFTDSGKYFCLAHVRNSTGQDNVLDADITINVGK<b>LTTDDLTMVVS</b>RLL ERVDEGEVKQEENRQNILSVEEDLTDRLVNTTIVVSRLLEEVNNGEEKQDENSRKLLMEEYVYNLIANLSRI<b>QEALNQNI</b> EKATLKMETTITTSRGNCKRGFDKITYGQLFACVWVSSAPLDFFGARDSCALGARLMTLKTTRDKFNLETNNVGNKE FYIGLTDVFTEGIFR<b>WTDDDSISNLSSIQSFFRT</b>GEPNDHAG</p> |

|                                                                                                                                                                                                                                                                                                                                                                                           |                                                                                                                                             |                                                                                                                                                                                                                                                                                                                                                                                                                                                                                                           |
|-------------------------------------------------------------------------------------------------------------------------------------------------------------------------------------------------------------------------------------------------------------------------------------------------------------------------------------------------------------------------------------------|---------------------------------------------------------------------------------------------------------------------------------------------|-----------------------------------------------------------------------------------------------------------------------------------------------------------------------------------------------------------------------------------------------------------------------------------------------------------------------------------------------------------------------------------------------------------------------------------------------------------------------------------------------------------|
| <p><b>PREDICTED: Uncharacterized protein LOC106065543</b><br/>[<i>Biomphalaria glabrata</i>] (100%);<br/>Sequence ID: XP_013079834</p> <p><u>Domains:</u><br/>-Signal peptide: none<br/>-lg: none<br/>-Coiled coil: none<br/>-C-lect: 144-283</p> <p><b>PREDICTED: C-type lectin domain family protein</b> [<i>Biomphalaria glabrata</i>] (36%); Sequence ID: XP_013081459.1</p>          | <p>LGUN_random_Scaffold20861:<br/>821-2283</p>                                                                                              | <p>MLK<b>INSLVLSRV</b>TSADNDTIEELIILNYESNNTSKTSKNPKGSIGFNGASYVSLTWPNPYSYRDASKYKCEARGVSTSFNKI<br/>SAAAYASVETDEPDIRSLVDELLHLRKETYETSNSLKEVKQ<b>KYASLNEVLQK</b>SVNKLNAEKQLSKNSFFISSNVFQGKRY<br/>MSRKQASNDINKAQATCAFYGGYLVEIDTTDEYTFVNFVFIKSVSANDSTFSCVYNGLMDPENDGIWTHVFTKKDSKFLP<br/>WGKGEPQNTADYNMCMLEKSYNWRYNDLPCYYADALRYLCEIPEDEQTVSN</p>                                                                                                                                                                 |
| <p><b>PREDICTED: Uncharacterized protein LOC106062883 “CREP-Like”</b> [<i>Biomphalaria glabrata</i>] (100%); Sequence ID: XP_013076651</p> <p><u>Domains:</u><br/>-Signal peptide: 1-19<br/>-lg: 26-148<br/>-Coiled coil: 148-176<br/>-C-lect: 199-335</p> <p><b>PREDICTED: C-type lectin domain family protein</b> [<i>Biomphalaria glabrata</i>] (49%); Sequence ID: XP_013081459.1</p> | <p>LGUN_random_Scaffold16778:<br/>502-660; 1390-2477</p>                                                                                    | <p>MITIPCVFLCVLYVAVSWAATIDIKPNVITVPVTRNLVIVCSLKRVTPELSALFSLTLLHSNAMDEPK<b>FTSLASVNTLDNKI</b><br/>STFSLDESATVAGLINNSGESFLRLTWKNPMSEKSGLYRCSFNGVGVGLGNPLTLTSTGAVVSVTDYDSLTDKMKDFEN<br/>SSKELKAKFDILSDYTNLHTNYSNLISRLSRDAAFYSTSSFNRSRYLPRDLVLTQVATCELYGGHLAEIDSNEE<br/>FHFVRNFLVSK<b>NLFDVVVTGANDEEKEGTWIYNRNKAPLKVFNWATTEPNSGRIAN</b>CQCFWK<b>GGNWY</b>MADARCVY<br/>FNNKPNDGYVYSYLCEMPESSTDV</p>                                                                                                            |
| <p><b>PREDICTED: Uncharacterized protein LOC106065054</b><br/>[<i>Biomphalaria glabrata</i>] (100%);<br/>Sequence ID: XP_013079269; 612<br/>aa</p>                                                                                                                                                                                                                                        | <p>LG4_random_Scaffold311:<br/>172599 -172997; 177150-<br/>177253; 177834-177972;<br/>179067-179206; 182629<br/>182787; 183969 -184116;</p> | <p>MLFLKLVTLVLLYKCNKVLADDDTPAETQSTVNWYCPEGWTFANDGHNITCLWFSNTSLYQVKAQTICK<b>NFGSSLVKL</b><br/>HTEDKIKAFKENFSK<b>LENDIYIGLRK</b>ERGYDASYMWDGINGLEIANISILPSTVKDSIHYKLSVYINTQGEWDIDDCEY<br/>NFVCEK<b>SVECKPGSFGDKCFNQCHCLGEP</b>CPK<b>SSSEIRCKYGCQTGW</b>MGNACDLEKQDP<b>DVKYKCVNSQEK</b>GKYVNI<br/>RIYTKGVHYRSIYGLNVNKRSPWCYSSISEDIDSSLPVTITIPVKEELQEVLES GCAGEHLSNDTYLWTVVIK<b>ENEGILLE</b><br/><b>HDLQVTIKCDFSKSESLIRNSAYS</b>VIG<b>QPTELHK</b>QFLEPQSTEDDVSVMQVVDSSYSGQVISEAAVGSVTLTIK<b>FGLKEGSLI</b></p> |

|                                                                                                                                                                                                                                                                                                                                                                                                       |                                                    |                                                                                                                                                                                                                                                                                                                                                                                                         |
|-------------------------------------------------------------------------------------------------------------------------------------------------------------------------------------------------------------------------------------------------------------------------------------------------------------------------------------------------------------------------------------------------------|----------------------------------------------------|---------------------------------------------------------------------------------------------------------------------------------------------------------------------------------------------------------------------------------------------------------------------------------------------------------------------------------------------------------------------------------------------------------|
| <p><u>Domains :</u><br/> -Signal peptide: 1-20<br/> -C-lectin: 36-165<br/> -EGF: 170-212<br/> -ZP: 262-474<br/> -Trans-membr: 549-571</p>                                                                                                                                                                                                                                                             | <p>185191-185348; 187829-187984; 191164-191717</p> | <p><b>KGITPYDCYATSPDNKFKKQLIDSQGCPSGSPISAFSER</b>DDNSIQTQWFPLFAFEGEQNVVFQCSFDLCFLKGCQVGC<br/> RAFRFHKRSAEDYPETLHEHFTKSTIAVLANKIPISMPESADNNSLSKSSQTPKSSNILAYFNPVTCISIFLVLLVLIIVTYM<br/> SFMVALRKSVMGIRREIDYVISRDKLLCYGKIPKDKNCDCNCPYNC</p>                                                                                                                                                               |
| <p><b>PREDICTED: Uncharacterized protein LOC106061984</b><br/> [<i>Biomphalaria glabrata</i>] (100%);<br/> Sequence ID: XP_013075688</p> <p><u>Domains:</u><br/> -low complexity: 25-37/ 58-72<br/> -Ig-like : 88-206<br/> -Coiled coil: 216-276<br/> -lectin domains: none</p> <p><b>PREDICTED: Fibroleukin-like</b><br/> [<i>Biomphalaria glabrata</i>] (45%);<br/> Sequence ID: XP_013070005.1</p> | <p>LGUN_random_Scaffold15796:<br/> BGLB005673</p>  | <p>MHYRNINCQTANLHFISEFPARLVTTTTSSSTPETTTKILSTKIEWYTSTTAQPKIKTTSTVTMKQPMTTTTVNISSPPESRL<br/> QIYGSSEIIQELIEPLTIKCLYK<b>TLIQGERDTSALQSLYLLHETNGVIAIYINK</b>QQPVIATIQGDNFK<b>NVEGEIFDNESKDSYLQ</b><br/> <b>VTWNDLKR</b>SESGKYFCEAYVNHS DGRFDKMNEMLTIIVKSPTFDDLKVIQKLQRAEVDKETVRENQHKIKTIQEDLD<br/> TKQQDIISLKEDMNTTKQDIMSIKEDLDTKSQNILSIRENFDTNKHNMIIFQDNLTMTVANLSAALMEVENSQKVFVTFYII<br/> SLSLCEAYILN</p> |
