# Supplementary material for: Proteomic analysis of Biomphalaria glabrata plasma proteins with binding affinity to those expressed by early developing larval Schistosoma mansoni
Source: PubMed Central journal article supplement (PMC5433772; doi:10.1371/journal.ppat.1006081), 2017-05-16
Supplement: ppat.1006081.s005.pdf [file ppat.1006081.s005.pdf]

**S4 Table. Protein sequences, identified domains and genomic locations in VectorBase of NMRI and BS-90 *Biomphalaria glabrata* VIgL domain-containing plasma proteins eluted from larval transformation protein (LTP) affinity columns.**

| Protein ID                                                                                                                                                                                                         | Scaffold No.                                                                                                                                                                                             | Predicted Protein Sequence                                                                                                                                                                                                                                                                                                                                                                                                                                                                                                                                                                                                                                                                                                                      |
|--------------------------------------------------------------------------------------------------------------------------------------------------------------------------------------------------------------------|----------------------------------------------------------------------------------------------------------------------------------------------------------------------------------------------------------|-------------------------------------------------------------------------------------------------------------------------------------------------------------------------------------------------------------------------------------------------------------------------------------------------------------------------------------------------------------------------------------------------------------------------------------------------------------------------------------------------------------------------------------------------------------------------------------------------------------------------------------------------------------------------------------------------------------------------------------------------|
| <p><b>FREP 2.28</b> [<i>Biomphalaria glabrata</i>] (100%); Sequence ID: ADK11410</p> <p><u>Domains:</u><br/>-Signal peptide: 1-20<br/>-Ig: 38-148<br/>-FBG: 181-382</p>                                            | <p>500-1158:<br/>LGUN_random_Scaffold563550:<br/>640-1300; rev. frame; 1994bp<br/>LGUN_random_Scaffold9301:<br/>368-1028; 12407bp<br/>199-502:<br/>LGUN_random_Scaffold534902:<br/>1310-1613; 1684bp</p> | <p>MASLPLRLVLLVSMVTLIRSSSWLNFTGNSETIRELIQPLKLTCTFQISKNDSEENDSQVLFMSIYHETKRVIASISK<br/> <b>YQPVATSLYPSVTKV</b>QGGQIYHSNESKDSYLQVTWTHPKLSESGKYFCLAHAWNSTSQNSVFDADITVNVIK<b>SST</b><br/> <b>DDLAVALSYIQDRLDKDGVDSIQISR</b>ASPTLPESCRDVISSDR<b>VVVTLASGLKVM</b>CDTK<b>TDGGGWII</b>FQRRING<br/> YVDFYRGWKEYRDGFGDYDIGEFYLG NENIFKLTSSKKYDLRIDLEFNNTKYFAFYTRFEILGEQDYKLGIGGYS<br/> GNAGDALTNIHNDKFFSTYDKDNDLGTSGSCAVTHKGAWWYRDCYDSSLNGKWGSDRINWSKLTGITKSVT<br/> FTEMKIREIELN</p>                                                                                                                                                                                                                                                                      |
| <p><b>FREP 3-2 precursor</b> [<i>Biomphalaria glabrata</i>] (100%); Sequence ID: AAK28656</p> <p><u>Domains:</u><br/>-Signal peptide: 1-18<br/>-Ig: 28-134/183-301<br/>-Coiled coil: 314-382<br/>-FBG: 451-655</p> | <p>LG3_random_Scaffold2841:<br/>18324:26062; BGLB000204;<br/>253aa/ 655aa; 65764bp</p>                                                                                                                   | <p>MARLFLFILCVFVVS LAGSELVIDVQPNVISPEITPQLVINCSITNNEVQTLDLIKSLTSLRYNETIREFDELIALDSL<br/> TLNLKQFVRFKYSQISFGNRYITLILHNPTQFDARIYKCNATGTNSEGANISLFAKKA VEYETNSTALIEEIRRIKDD<br/> ENYCSFKKDDLSDSKQRSRVYFSGSSDIKERIEPLTKCTFQVLKTDQNETSRLQSLYLHESKGVIAVYVNDKQPV<br/> VTSLQGSNIQDVEGEIYD NAIKDSYLQVTWSNLKHSESGKYFCEAHNKYSEGRIDKSSNMLTITVERPTFDDLVE<br/> AMHKLFTQVDGAKESLKAINQNIKNINKDLDFKEQNITSIKQEVIRNQNNIQLSEDLNIKEQNLTSIKADLSTKQ<br/> QTFLNIKEDVILNQIIHKIKQDLNTYRHNMSNIEEHLEVILTNLSTASIKVKNQTDEGSKMSYPPRKRCDVNS<br/> TDERVVVTLTSLGLKVMCDTK<b>TDGGGWII</b>FQRRING<b>NVDFYR</b>GWKEYRDGFGDYDIGEFYLG NENIYMLTSTG<br/> QYNLRIDLKYNKAFFAQYSGFKILSEKEYKLNIGAYSGNSGDNFSSHNAFFFTFDRDNDEYSYNCAVDYTG<br/> AWWYHSSCLNCNLNGKWGSSDFAKGVNWDLSRFDSSVSFTEMKIREI</p> |
| <p><b>FREP12 FBG variant 2, partial</b> [<i>Biomphalaria glabrata</i>] (100%); Sequence ID: AAT58639;</p> <p><u>Domains:</u><br/>-Ig: none; C-term seq only<br/>-FBG: 1-128</p>                                    | <p>LGUN_random_Scaffold1434:<br/>56555:64579; BGLB000011 (86%)<br/>LGUN_random_Scaffold2702:<br/>15650:23178; BGLB000021 (86%)<br/>LGUN_random_Scaffold4104:<br/>4421:17121; BGLB0000133 (85%)</p>       | <p>TK<b>TDGGGWII</b>FQRRINGKVN FYRGWKEYR<b>DGFGDYDIGEFYLG NENIFKLTSTGQYDLR</b>IDLEFKNTKYFAQYE<br/> <b>DFKVL</b>SETEKYK<b>LQIGDYLG NAGDDLSPHNMFFSTFDR</b>DNDVDVSHLNCAEYCS</p>                                                                                                                                                                                                                                                                                                                                                                                                                                                                                                                                                                    |
| <p><b>PREDICTED: ficolin-2-like</b> [<i>Biomphalaria glabrata</i>] (100%); Sequence ID: XP_013071685;</p>                                                                                                          | <p>LGUN_random_Scaffold11134:<br/>377-790; 2673-3506</p>                                                                                                                                                 | <p>MLIVTVATATFDDLKVIQKLMQADEDEKEIQENKQK<b>INIQEDFDTRQQNLS</b>PFKDILVNGKKDYKEMNTSD<br/> SILPDRPCNVNSTKR<b>RLVNLASGLKVMCDTMTDGGGWIII</b>QRRIG<b>GMVDFNRDWQ</b>EYRDGFGDYDIGEFY<br/> <b>GNENIYKLTSSGN</b>YELRVDLEINYSFYALYSK<b>FQIMNESNKYK</b>LKISGYLG NATDSLAWHDNLNFSTYKDNKN<br/> <b>NIPNCLFKYPGPGGW</b>WFAGHGSNLNGVWRSRFRNQINWYGLTGYK<b>SAYFSEM</b>KIREKY</p>                                                                                                                                                                                                                                                                                                                                                                                     |

|                                                                                                                                                                                                                                                                                                                                                                                                |                                                                               |                                                                                                                                                                                                                                                                                                                                                                                                                                                                                                                                                                                                                                                                                                                      |
|------------------------------------------------------------------------------------------------------------------------------------------------------------------------------------------------------------------------------------------------------------------------------------------------------------------------------------------------------------------------------------------------|-------------------------------------------------------------------------------|----------------------------------------------------------------------------------------------------------------------------------------------------------------------------------------------------------------------------------------------------------------------------------------------------------------------------------------------------------------------------------------------------------------------------------------------------------------------------------------------------------------------------------------------------------------------------------------------------------------------------------------------------------------------------------------------------------------------|
| <p><u>Domains:</u><br/>-lg: none<br/>-Coiled coil: 12-53<br/>-FBG: 71-280</p> <p><b>PREDICTED: Fibrinogen C domain-containing protein</b><br/>[<i>Biomphalaria glabrata</i>]<br/>(50%); Sequence ID:<br/>XP_013072469.1</p>                                                                                                                                                                    |                                                                               |                                                                                                                                                                                                                                                                                                                                                                                                                                                                                                                                                                                                                                                                                                                      |
| <p><b>PREDICTED: angiopoietin-4-like</b> [<i>Biomphalaria glabrata</i>]<br/>(100%); Sequence ID:<br/>XP_013069966</p> <p><u>Domains:</u><br/>-lg: none<br/>-Coiled coil: 97-192<br/>-Internal repeat: 202-286/<br/>286-363<br/>-FBG: 403-563</p> <p><b>PREDICTED: Fibrinogen C domain-containing protein</b><br/>[<i>Biomphalaria glabrata</i>]<br/>(47%); Sequence ID:<br/>XP_013093995.1</p> | <p>LG3_random_Scaffold99:2047-3202; 5313-5785</p>                             | <p>MYIFHETNGVIATINKGQTVVTAIQEVGSNNVKGELSDEKLHESYLQVTVWRNLRSSDSGKYFCGAHVIGSDGR<br/>AERLNEMVTIQVKLPTEFDLVNVIQKLLIQANDDREILQDNKQNIKSIQNELRNNQDNVIKMYKLDNHEQNF<br/>IRIKKDLDSNQQNIKIINQDLNQQQNIIRINTDLSKEQQFTRFNKDLDSKQQDIIRIDKDLNATEHNITRINKDI<br/>DSKQQDIIRIDKDLNATEHNITRINKDIDSKQQDIIRIDKDLNATKHNITRINKDIDSKQQDIIRIDKDLNATKH<br/>RINKDLDSKQQNIIRIDKDLNATKHNITRINKNLDKQQDIISIKQDLESSKDFNEHRQNISIFKDILDTVIYNLSS<br/>SLTDVKQELTKELSDGIKICISGHIHAASCRNRSSDYYVFLVLLPSGLKVMCDTKTDGGGWIIIFQRINGKVN<br/>FYRGWEEYRGGFGDFDIGEFYLGNEIFKLTSTGQYDLRIDLEFKNTKYFAQYEDFKVLSETEKYKIQIGDYS<br/>GYAGDDLSPHNNMFFSTFDRDNDGQKKISTVHKVIKNQENLISDSK</p>                                                                                        |
| <p><b>PREDICTED: Fibrinogen C domain-containing protein</b><br/>[<i>Biomphalaria glabrata</i>]<br/>(100%); Sequence ID:<br/>XP_013072469</p> <p><u>Domains:</u><br/>-Signal peptide: 1-19<br/>-lg: 27-141</p>                                                                                                                                                                                  | <p>LGUN_random_Scaffold1199:<br/>57142-57604;61307-61835;<br/>65995-66891</p> | <p>MAHMOVHLLTCVVVLSLSSSELIIDVRPDIISLEITPQLVINCSITNNKVQHLDVMNSLTLTRYDKTIRDFIALITLDS<br/>STLNLKQLTKFSNSQVSGFNLYLALTLHYPTQFQDAKVYRCSVNGNANGTDVSLSAKKGVEYETNSTALIEEIR<br/>LKKDEDTYKCSFKKTDPRGSRVHFFASSEIKERIEPLTNCSEFQVSYLFIHNFVNNMSTPEAYETVEHILYEYR<br/>MLRNTIEDTTSFETERTGAWLGLTLTYGDKRTLQNTGRDLVETNGVIATINKGQPVLTTHGGHSNSRNAKGEIF<br/>DNEKDSYLQVTLNQLFSESGKYFCEAHVKRSQGGVERLNKMLAISVLSPTFEDLVKVIKVLKRSDEDNIRIRE<br/>NGQTLRNIQEDSDTKEKNIKSIEDLNTKQQNIISLKEDFNAFQRTMNTFREKLEVISANVSKIERERTEDKEIAS<br/>CREVKTREERVVVTLASGLKVMCDTKTDGGGWIIIFQRRTYGIIVDFYRSWQYERDGFQVSDVIGEFYLGNEIYN<br/>LTSSAKYDLRIDIKYNRNSYAAQYSDFQILSEKDKYKLGIGAYSGNAGDLSYHNNMFFSTYDKDNDLYGSNCAT<br/>NYLSAWWYNSCHNSNLNGQWGSKVNSNGVIWNTLTKEGASFTKIREK</p> |

|                                                                                                                                                                                                                                                                                                                                                       |                                                                                                                                                                                                                                              |                                                                                                                                                                                                                                                                                                                                                                                                                                                                                                                                                                                                                                                                                                                                      |
|-------------------------------------------------------------------------------------------------------------------------------------------------------------------------------------------------------------------------------------------------------------------------------------------------------------------------------------------------------|----------------------------------------------------------------------------------------------------------------------------------------------------------------------------------------------------------------------------------------------|--------------------------------------------------------------------------------------------------------------------------------------------------------------------------------------------------------------------------------------------------------------------------------------------------------------------------------------------------------------------------------------------------------------------------------------------------------------------------------------------------------------------------------------------------------------------------------------------------------------------------------------------------------------------------------------------------------------------------------------|
| <p>-Coiled coil: 383-450<br/>-FBG: 452-627</p>                                                                                                                                                                                                                                                                                                        |                                                                                                                                                                                                                                              |                                                                                                                                                                                                                                                                                                                                                                                                                                                                                                                                                                                                                                                                                                                                      |
| <p><b>Galectin-related protein precursor (GREP)</b><br/>[<i>Biomphalaria glabrata</i>]<br/>(100%); SequenceID: AKS26835.1</p> <p><u>Domains:</u><br/>-Signal peptide: 1-20<br/>-Ig: 28-133/208-325<br/>-Gal-binding: 473-610</p>                                                                                                                      | <p>LGUN_random_Scaffold_18083: 2985-3023; 2124-2167; 2738-2840; 1688-2124; 624-705; 123-183;<br/>LGUN_random_Scaffold_47310: 864-1192;<br/>LGUN_random_Scaffold_120741: 407-476;<br/>LGUN_random_Scaffold_5606: 17851-18203; 15817-16198</p> | <p>MKRLLLPLLLTSLQGSLELIIQVNPGLTSPGLTPKLTVNCSSINESVAELNAIQSLMSRYNETSK<b>TFDVLTYIDK ETL</b>SLKQIVELKGAQISFGNLFILLTIPSPSQYDCQTYSCIANGYNKFGNND SISTKVKVESRTNITEYIKEINRLK<b>KL EANS</b>IMEDNVPLKNIEKLILANMNIQMCSLT TNKTS EDLIEK<b>ATLHFSVNSK</b>TIKEFLEPMIMKCTFQVSKNNAS QNLTVHYMYIR<b>HETNGVLATISR</b>DQQVGISQDTSLSQVQGLSDQDFNISYLQVIWIKPSPSQSGKY<b>YVCGANI V</b>NQEGQLEKL<b>KASLEITIEK</b>TSLEDLVPIVIDLLAERTKVRHILEASMKEVIEIKQVRS AVIENVRLINQNSSTSFV LFSNIEFGCKPNHTSQIKTLAINCLRNVHCAALMCAKDLTCTPCDR<b>SAISGLRFPDHGSEMYLKRSLVLSQVEK R</b>LPPVLVLSSEIAVPSGLR<b>AEDLIYFRV</b>TLLKY<b>YDNFYIDL</b>YEDNYNINYQ<b>FR</b>ARCD DDQCSIKGDCSESDCKSKFVT IGSKTSGFWSRSFVTRDYPVFLNEEFEMYLIIHQDSVDVYIK<b>DKLFANIKTPR</b>KPEDVR<b>VIQFGGTIVLHEL</b>SL</p> |
| <p><b>PREDICTED: Uncharacterized protein LOC106063810, partial</b> [<i>Biomphalaria glabrata</i>] (100%); Sequence ID: XP_013077728</p> <p><u>Domains:</u><br/>-Ig: 1-73<br/>-lectin domain: none (N-term seq only)</p> <p><b>Galectin-related protein precursor (GREP)</b><br/>[<i>Biomphalaria glabrata</i>]<br/>(96%); Sequence ID: AKS26835.1</p> | <p>LGUN_random_Scaffold18083: 1688-2120; 624-705; 75-186;</p>                                                                                                                                                                                | <p>MSLYNETSK<b>TFDVLTYIDK ETL</b>SLKQIVELKGVQISFGNMFILLTIPSPSQYDCQTYSCIANGYNKYGNND SISTKV KVESRTNITEYIKEINRLK<b>KEANS</b>IMEDNVPLKNIEKLILANMNIQMCSLT TNKTS EDLIEK<b>ATLHFSVNSKTIKEL LQP</b>MIMKCTFQVSKNDASQNFVHYMYIRHGKNDTTIHWRIQEGGG</p>                                                                                                                                                                                                                                                                                                                                                                                                                                                                                            |
| <p><b>C-type lectin-related protein 2 precursor, partial (CREP2)</b><br/>[<i>Biomphalaria glabrata</i>]<br/>(100%); Sequence ID: AKS26832</p> <p><u>Domains:</u><br/>-Ig-like: 15-132</p>                                                                                                                                                             | <p>LGUN_random_Scaffold35213: 1403-1468 (98.5%)<br/>LGUN_random_Scaffold34937: 746-1051 (71.9%)<br/>LGUN_random_Scaffold205317: 1-272 (98.2%)<br/>LGUN_random_Scaffold46202: 1045-1228 (100%)</p>                                            | <p>FRELDLGSRLTFTGNSETIKEIFEPLILSCSFQVAKHDVKENGVILMYIFQETKGVIAITISK<b>GQPFAYSTEP</b>RHTFA QGNIGDEKLNK<b>SYLQVTR</b>KNPNSLESKYFCLAHVRDSAGKDKV FHASIKINIEKSN SDDLVPALGRVLERLDRI EERQEATEQKIVDAQEDFNIQIGNLSSVLDQEKPKKEEDNVLCNAGFHKITDGOISACVWVSNVSMNYIQAR DDCKEKGAHLLTLKTEKFTLLHKNDPGRYLWIGLTDRL<b>IEDIFKWDD</b>NSIC<b>NPLCR</b>GRLFSTGEPNDSGGEE DCVVYYPTRMKLNDNNGCSTNHYMCEHPI</p>                                                                                                                                                                                                                                                                                                                                                       |

|                                                                                                                                                                                                                                                                                                                                                                                           |                                                                                                                                                                      |                                                                                                                                                                                                                                                                                                                                                                                                               |
|-------------------------------------------------------------------------------------------------------------------------------------------------------------------------------------------------------------------------------------------------------------------------------------------------------------------------------------------------------------------------------------------|----------------------------------------------------------------------------------------------------------------------------------------------------------------------|---------------------------------------------------------------------------------------------------------------------------------------------------------------------------------------------------------------------------------------------------------------------------------------------------------------------------------------------------------------------------------------------------------------|
| <p>-Coiled coil: 142-174<br/>-C-lect: 196-325</p>                                                                                                                                                                                                                                                                                                                                         | <p>LGUN_random_Scaffold113935:<br/>1-178 (97.8%)</p>                                                                                                                 |                                                                                                                                                                                                                                                                                                                                                                                                               |
| <p><b>C-type lectin-related protein 3 precursor, partial (CREP3)</b><br/>[<i>Biomphalaria glabrata</i>]<br/>(100%); Sequence ID: AKS26833</p> <p><u>Domains:</u><br/>-Signal peptide: 1-19<br/>-lg: 29-145<br/>-Coiled-coil: 226-251<br/>-C-lect: 261-360</p>                                                                                                                             | <p>LG3_random_Scaffold2051:<br/>76877-77044; 74469-74550;<br/>LGUN_random_Scaffold38320:<br/>919-1386;<br/>LG3_random_Scaffold2051:<br/>66872-67025; 63650-63835</p> | <p>MKTLHLVLALCAFIIVTLVLCSSPTVFTANSETVKEQFQPLILSCSVKVSNGNEPIQDANVHLLYLHETKRIIARISKD<br/>QPVGTSQNPQSIQVQGGQINENKAMHSYLQVTWTPKFTDSGKYFCLAHVRNSTGQDNVLDADITINVGKLT<br/>TDDLTMVVSRLRLERVDEGEVKQEENRQNILSVEEDLTDRLVNTTIVVSRLRLERNNGEEKQDENSRLKLMEEY<br/>VYNLIANLSRIQEALNQNIKATLKMETTTITTSRGNCKRGFDKITYGQLFACVWVSSAPLDFFGARDSCALGA<br/>RLMTLKTDRKFNLETTNNVGNKEFYIGLDFVTEGIFR<b>WTDDDSISNLSSIQSFFRT</b>GEPNDHAG</p>   |
| <p><b>PREDICTED: Uncharacterized protein LOC106065543</b><br/>[<i>Biomphalaria glabrata</i>]<br/>(100%); Sequence ID: XP_013079834</p> <p><u>Domains:</u><br/>-Signal peptide: none<br/>-lg: none<br/>-Coiled coil: none<br/>-C-lect: 144-283</p> <p><b>PREDICTED: C-type lectin domain family protein</b><br/>[<i>Biomphalaria glabrata</i>];<br/>(36%); Sequence ID: XP_013081459.1</p> | <p>LGUN_random_Scaffold20861:<br/>821-2283</p>                                                                                                                       | <p>MLK<b>INSLVLSR</b>VTSADNDTIEELIILNYESNNTSKTSKNPKGSIGFNGASYVSLTWPNPSPYRDASKYKCEARGV<br/>STSFNKISAAAYASVETDEPDIRSLVDELLHLRKETYETSNSLKEVKQKYASLNEVLQKSVNKLNAEKQLSKNSFFI<br/>SSNVFQGGKRYMSRKQASNDINKAQATCAFYGGYLVEIDTTDEYTFVNVNFIKSVSANDSTFSCVYNGLMDPEN<br/>DGIWTHVFTKKDSKFLPWGKGEPQNTADYNMCMCLEKSYNWRYNDLPCYYADALRY LCEIPEDEQTVSN</p>                                                                         |
| <p><b>PREDICTED: Uncharacterized protein LOC106062883</b><br/>"CREP-Like" [<i>Biomphalaria glabrata</i>] (100%); Sequence ID: XP_013076651</p>                                                                                                                                                                                                                                            | <p>LGUN_random_Scaffold16778:<br/>502-660; 1390-2477</p>                                                                                                             | <p>MITIPCVFLCVLYAVSWAATIDIKPNVITVPVTRNLVIVCSLK<b>RVNTPELSALFSLTLLHSNAMDEPKFTSLASVN</b><br/><b>TLDNK</b>ISTFSLDESATVAGLINNSGESFLR<b>LTKNPMSEK</b>SGLYRCSFNGVGLGNPLTLTSTGAVVSVTDYD<br/>SLTDKMKDFENSSKELKAKFDILSDYTNLHTNYNSLISRLSRSDAAFYSTSSFNRSRYLPRDLQVLTWQAQ<br/>ATCELYGGHLAEIDSNEEFHFVRNFLVSK<b>NLFDVVVTGANDEEKEGTWIYNRNKAPLKVFNWATTEPNSGRIA</b><br/><b>NCQCFWKGGNWMADARCVYFNNKPNPDGYVYSYLCEMPESSTDV</b></p> |

|                                                                                                                                                                                                                                                                                                                                                                    |                                                                                                                                                                                                 |                                                                                                                                                                                                                                                                                                                                                                                                                                                                                                                                                                                                                                                                                                                         |
|--------------------------------------------------------------------------------------------------------------------------------------------------------------------------------------------------------------------------------------------------------------------------------------------------------------------------------------------------------------------|-------------------------------------------------------------------------------------------------------------------------------------------------------------------------------------------------|-------------------------------------------------------------------------------------------------------------------------------------------------------------------------------------------------------------------------------------------------------------------------------------------------------------------------------------------------------------------------------------------------------------------------------------------------------------------------------------------------------------------------------------------------------------------------------------------------------------------------------------------------------------------------------------------------------------------------|
| <p><u>Domains:</u><br/> -Signal peptide: 1-19<br/> -Ig: 26-148<br/> -Coiled coil: 148-176<br/> -C-lect: 199-335</p> <p><b>PREDICTED: C-type lectin domain family protein</b><br/> [<i>Biomphalaria glabrata</i>]<br/> (32%); Sequence ID:<br/> XP_013081459.1</p>                                                                                                  |                                                                                                                                                                                                 |                                                                                                                                                                                                                                                                                                                                                                                                                                                                                                                                                                                                                                                                                                                         |
| <p><b>PREDICTED: Uncharacterized protein LOC106062128</b><br/> [<i>Biomphalaria glabrata</i>]<br/> (100%); Sequence ID:<br/> XP_013075857</p> <p><u>Domains:</u><br/> -Ig: none<br/> -Internal repeat: 1-64/<br/> 57/120<br/> -C-lect: 1-61</p> <p><b>PREDICTED: Techylectin-like protein</b> [<i>Biomphalaria glabrata</i>] (89%); Sequence ID:XP_013089083.1</p> | <p>LGUN_random_Scaffold6870<br/> :6587:15188: BGLB000131 (91%;<br/> 147/156)</p>                                                                                                                | <p>MNSTKQDIISLKDNMNSTKQYIVSIKKDLDTTQANMKSLNEDFYTNIQNITSIKKDMNTYKENILRIETDLDSNK<br/> QNIVSIRKEADTNKQDIIRIKEDLDTKQQNMLSIRENVDTNRHNMSIFQENLTMVMANLSTELKEVQSQIHKD<br/> PRKMGELE</p>                                                                                                                                                                                                                                                                                                                                                                                                                                                                                                                                         |
| <p><b>PREDICTED: Uncharacterized protein LOC106065054</b><br/> [<i>Biomphalaria glabrata</i>]<br/> (100%); Sequence ID:<br/> XP_013079269</p> <p><u>Domains :</u><br/> -Signal peptide: 1-20<br/> -C-lectin: 36-165<br/> -EGF: 170-212</p>                                                                                                                         | <p>LG4_random_Scaffold311:<br/> 172599 -172997; 177150-177253;<br/> 177834-177972; 179067-179206;<br/> 182629 182787; 183969 -184116;<br/> 185191-185348; 187829-187984;<br/> 191164-191717</p> | <p>MLFLKLVTLVLLYKCNKVLADDDTPAETQSTVNWYCPEGWTFNDGHNITCLWFSNTSLYQVKAQTICKNFG<br/> SSLVKLHTEDKIKAFKENFSLENDIYGLRKERGYDASYMWDGINGLEIANISILPTSVKDSIHYKLSCVYINTQG<br/> EWDIDDCETEYNFVCEK<b>SVECKPGSFGDKCFNQCHCLGEPKNPK</b>SSEIRCK<b>YGCQTGWMGNACDLEKQDPD</b><br/> <b>VKYYCVNSQEK</b>GKYVNIRIYTKGVHYRSIYGLNVNKRSPWCYSSISEDIDSSLPVTITIPVKEELQEVLESGSCA<br/> GEHLSNDTYLWTVVIKENEGILLEHDLQVTIK<b>CDFSKSELRNSAYSVIGQPTLHK</b>QFLEPQSTEDDVSMQVV<br/> DSYSGQVISEAAVGSSVTLTIK<b>FGLKEGSLIKGITPYDCYATSPDNKFKKQLIDSQGCPMSGSPISAFSER</b>DDNSI<br/> QTQWFPLFAFEGEQNVVFCQSFDCFLKGCQVGCRAFRFHKRS AEDYPETLHEHFTKSTIAVLANKIPISMPES<br/> ESADNNSLSKSSQTPKSSNILAYFNPTCSIFLVLLVLIIVTYMSFMYALRKS VGNIRREIDYVISRDKLLCYGKIPK<br/> DKNCDNCNCPYNC</p> |

|                                                                                                                                                                                                                                                                                                                                                                                                    |                                                         |                                                                                                                                                                                                                                                                                                                                                                                        |
|----------------------------------------------------------------------------------------------------------------------------------------------------------------------------------------------------------------------------------------------------------------------------------------------------------------------------------------------------------------------------------------------------|---------------------------------------------------------|----------------------------------------------------------------------------------------------------------------------------------------------------------------------------------------------------------------------------------------------------------------------------------------------------------------------------------------------------------------------------------------|
| <p>-ZP: 262-474<br/>-Trans-membr: 549-571</p>                                                                                                                                                                                                                                                                                                                                                      |                                                         |                                                                                                                                                                                                                                                                                                                                                                                        |
| <p><b>PREDICTED: Uncharacterized protein LOC106061984</b><br/>[<i>Biomphalaria glabrata</i>]<br/>(100%); Sequence ID:<br/>XP_013075688</p> <p><u>Domains:</u><br/>-low complex: 25-37/ 58-72<br/>-Ig-like : 88-206<br/>-Coiled coil: 216-276<br/>-Lectin domains: none</p> <p><b>PREDICTED: Fibroleukin-like</b><br/>[<i>Biomphalaria glabrata</i>]<br/>(45%); Sequence ID:<br/>XP_013070005.1</p> | <p>LGUN_random_Scaffold15796:<br/>BGLB005673 (100%)</p> | <p>MHYRNINCQTANLHFISEFPARLVTTTTSSSTPETTTKILSTKIEWYTSTTAQPKIKTTSTVTMKQPMTTTTVNIS<br/>SPPE SRLQYGSSEIIQELIEPLTIKCLYK<b>TLIQGERDTSALQSLYLLHETNGVIAYINK</b>QQPVIATIQQDNFKNVEGE<br/>IFDNESKDSYLQVTWNDLKRSESGKYFCEAYVNHS DGRFDKMNEMLTIIVKSPTFDDLKVIQKLQRQAEVDK<br/>ETVRENQHKIKTIQEDLDTKQQDIISLKEDMNTTKQDIMSIKEDLDTKSQNILSIRENFDTNKHNMIIFQDNLT<br/>MTVANLSAALMEVENS GKVFTFYIISLYSLCEAYILN</p> |
