# Supplementary material for: Proteomic analysis of Biomphalaria glabrata plasma proteins with binding affinity to those expressed by early developing larval Schistosoma mansoni
Source: PubMed Central journal article supplement (PMC5433772; doi:10.1371/journal.ppat.1006081), 2017-05-16
Supplement: ppat.1006081.s006.pdf [file ppat.1006081.s006.pdf]

**S5 Table. Protein sequences, identified domains and genomic locations in VectorBase of other immune-related NMRI and BS-90 *Biomphalaria glabrata* plasma proteins eluted from sporocyst membrane-enriched fraction (Mem) affinity columns.**

| Protein ID                                                                                                                                                                                                                                                                                                                       | Scaffold No.                                                                                                                                                                                                                                                                                                                                                                                                                                                                                                                                                                                                                                                                                | Predicted Protein Sequence                                                                                                                                                                                                                                                                                                                                                                                                                                                                                                                                                                                                                                                                                                                                                                                                                                                                                                                                                                                                                                                                                                                                                                                                                                                                                                                                                                                                                                                                                                                                                                                                                                 |
|----------------------------------------------------------------------------------------------------------------------------------------------------------------------------------------------------------------------------------------------------------------------------------------------------------------------------------|---------------------------------------------------------------------------------------------------------------------------------------------------------------------------------------------------------------------------------------------------------------------------------------------------------------------------------------------------------------------------------------------------------------------------------------------------------------------------------------------------------------------------------------------------------------------------------------------------------------------------------------------------------------------------------------------|------------------------------------------------------------------------------------------------------------------------------------------------------------------------------------------------------------------------------------------------------------------------------------------------------------------------------------------------------------------------------------------------------------------------------------------------------------------------------------------------------------------------------------------------------------------------------------------------------------------------------------------------------------------------------------------------------------------------------------------------------------------------------------------------------------------------------------------------------------------------------------------------------------------------------------------------------------------------------------------------------------------------------------------------------------------------------------------------------------------------------------------------------------------------------------------------------------------------------------------------------------------------------------------------------------------------------------------------------------------------------------------------------------------------------------------------------------------------------------------------------------------------------------------------------------------------------------------------------------------------------------------------------------|
| <p><b>PREDICTED: Lipopolysaccharide-binding protein-like</b> [<i>Biomphalaria glabrata</i>] (100%); Sequence ID: XP_013070669.1</p> <p><u>Domains:</u><br/>-Bactericidal permeability-increasing protein (BPI) / Lipopolysaccharide-binding protein (LBP): 1-193/ 180-384</p>                                                    | <p>LGUN_random_Scaffold1023: 50441-50613; 50252-50331; 49394-49526; 46627-46718; 45543-45623; 43433-43591; 40841-40951; 39401-39593</p>                                                                                                                                                                                                                                                                                                                                                                                                                                                                                                                                                     | <p>MLLINLLGHYFNSFRLNVAIPDIDMSFNVPVQRGLTMNLRNLGVDVLLDYRVRYKLLFVPISSSGGVSVN<br/>FRGVELTATVIGIDQFEDTSPRLVSRSCSAAGDFNINFSGSMAWLLNLLKGLFRGKIRDITIRSKICKDKVT<br/>EAINTQGADKLRQIPLESADIADKFVIDYR<b>LLSPVLFTDSYLETQHK</b>KLYKRGTLGYAAHTHGYLQYVISP<br/>DKLPAQSKGFLNTPCPSACAGTLIPLLAEKYPNSFVTLTISSSKAPDFNITSNGLGLTLYGTLDLSTTS<br/>ASAVVTANVVISIAGAAAFVRNDR<b>IVGNVAQFR</b>TVLADIDSQRLISLYTFQISSINK<b>ALDDGMNMVVIPQL</b><br/><b>NAVGDGTGIALPVLKDLTFQNPR</b>IVYQDKSVLISTNVQYQGIV</p>                                                                                                                                                                                                                                                                                                                                                                                                                                                                                                                                                                                                                                                                                                                                                                                                                                                                                                                                                                                                                                                                                                                                                                                   |
| <p><b>Thioester-containing protein 1.5 (TEP1.5)</b> [<i>Biomphalaria glabrata</i>] (100%); Sequence ID: ADE45333</p> <p><u>Domains:</u><br/>-Signal peptide: 1-21<br/>-Proteinase-binding alpha-macroglobulins: 126-219/ 463-599/ 718-808/ 978-1241<br/>-Thiol ester: 929-958<br/>-Alpha-2-macroglobulin-receptor: 1342-1426</p> | <p>LGUN_random_Scaffold4524: 9507-9566; 9149-9332; 8894-8916; 4705-4867; 1865-1933; 1610-1736;<br/>LGUN_random_Scaffold10725: 6705-6750; 4397-4481; 2567-2681; 2042-2159; 1413-1527;<br/>LGUN_random_Scaffold9700: 5915-6144; 3125-3226; 2777-2839; 709-909;<br/>LGUN_random_Scaffold8482: 12144-12290; 10814-10917; 10616-10675; 10307-10337;<br/>LGUN_random_Scaffold2300: 37595-37626;<br/>LGUN_random_Scaffold76986: 250-267;<br/>LGUN_random_Scaffold8482: 10166-10290;<br/>LGUN_random_Scaffold7766: 10058-10180; 9732-9849;<br/>LGUN_random_Scaffold45951: 828-903;<br/>LGUN_random_Scaffold7766: 277-407;<br/>LGUN_random_Scaffold53075: 386-529;<br/>LGUN_random_Scaffold6063:</p> | <p>MRMKNLNLILFVYLVFQECQGKGFISAPRNVVPGTAYDISVDILKQDIGNVTVEAILQDYSFSIPEGPK<br/>SLLTANGTFSPGVRGTLSPIDFNLHCSYCRILLKGYNPLQFEQDIFIQISSDILSIQTDKAIYKPK<br/>RVNFRILAVYYNLQLYGTGFHYEILDOPYDNKINVLGVSFGTGVVEGFFDLSDQPSFGTWKINVRTETVS<br/>GAESQFFEVAEYDLPRFQVDVGLPPFALLSDTTLSGSVEAKYTFGQPVYGLVLLQIGENVDTIDKCNVNR<br/>KVTEISFEIKGKGNFVPLEDIRRSVHLNEKKKIKITAFVIEASTGIKLNSSVITYYGNRYQIKFLEMT<br/>PAVFKPGLQYTAYVQVTTDPDGLPPTESNLSLSVYTSVTYQMTVPDQELYSPPSSFGSYPLPGQNMSLPAN<br/>GILSIDIDIPLNATSIDIKVSLNKQTAEKRISKSYSMSNNYLQLSLLSKLVAESDVLIK<b>ITSTE</b>AIDS<br/><b>LAYEIR</b>SRSDHVKSGVLELNGQREFNATFKVGPSPWAPIAQLLMYYIRRDSNEIVTDSLAFNVEGMFENKV<br/>NVAFKENETDINKNVSELSADSDSQIYVLAVDQSVLLKTGNDLTPNKVKDSFISKFKHKEVPTDSNFA<br/>LSYSGSSINEVFSNMGLVIATDLNIFAPFRPIALGRFPSSGFDRQGMGAPMAMFRDDNAMESASFEMD<br/>VATSTKPVERVR<b>SFFPESWLWTSVK</b>SINGHATLTTTVPDTITSWIVSAFATNSDTGLGVAPTTSKLRVFR<br/>PFFVSLTYPRSVTRNEQFIVQATVFNYLPVDLMVTVSLKENPFLTPITPGPNQASNIQVRANEQGIVYF<br/>SLSALTVGSLDTEVSARSNMAADAIVRQILIKHEGAPVVYNNPILINLSNNQSTFEK<b>NIAFTLPDSL</b>VPE<br/><b>SQR</b>IRVKVTGDLIGSTVQSLTLLTPTGCGEQSLVK<b>FTPNIHIGR</b>YLKATNQLSEELNKK<b>IDLLNDGY</b><br/><b>QR</b>QLTYKRYDNGFSAFGNYSSTWLTALVVTSAFAEQEFIFVDKEIILKASMLLIDRQNIIDGFSNEFG<br/>KVLDRNTQGTTAGPALTAFLVLLKAKELADVDCKNNNKCRYLLGNATLNATRNLERLMLADSIDD<br/>QFSLAVASYALAEAKSQAQSTFEKLLTFVKQEGGLEYSANSTVNNEELNRFINWRPRLQARPIDILI<br/>TSYAILTYSSLGRLEALPSVRWLTQKNAQGGFVSTQDQTVVGLQALSFGSKSFRPDTNITIYVSDMNT<br/>HLTMMNVNSENALSLLQIEIQSNQDQSITASGSLALLDIEYSFNVLKELSKPVFDANTVLLDDKLDLDFN<br/>IMVCTKFLMKHDTGMVVQELSIPSGFVDPDLSTLQVAVGKRSEKGSIVAIYFDKISGSSLCYSIVMTRE<br/>AKVAKSQKSYVR<b>TYDYE</b>PANQATV<b>FYQPR</b>TLRDSTVCDVCLNCCP</p> |

|                                                                                                                                                                                                                                                                                                                                                  |                                                                                                                                                                                                                                                                                                                                                                                                                                                                                                                                                                                                                                                                                                                                                                                                                                                                                                                                                                               |                                                                                                                                                                                                                                                                                                                                                                                                                                                                                                                                                                                                                                                                                                                                                                                                                                                                                                                                                                                                                                                                                                                                                                                                                                                                                                                                                                                                                                                                                                                                                                                 |
|--------------------------------------------------------------------------------------------------------------------------------------------------------------------------------------------------------------------------------------------------------------------------------------------------------------------------------------------------|-------------------------------------------------------------------------------------------------------------------------------------------------------------------------------------------------------------------------------------------------------------------------------------------------------------------------------------------------------------------------------------------------------------------------------------------------------------------------------------------------------------------------------------------------------------------------------------------------------------------------------------------------------------------------------------------------------------------------------------------------------------------------------------------------------------------------------------------------------------------------------------------------------------------------------------------------------------------------------|---------------------------------------------------------------------------------------------------------------------------------------------------------------------------------------------------------------------------------------------------------------------------------------------------------------------------------------------------------------------------------------------------------------------------------------------------------------------------------------------------------------------------------------------------------------------------------------------------------------------------------------------------------------------------------------------------------------------------------------------------------------------------------------------------------------------------------------------------------------------------------------------------------------------------------------------------------------------------------------------------------------------------------------------------------------------------------------------------------------------------------------------------------------------------------------------------------------------------------------------------------------------------------------------------------------------------------------------------------------------------------------------------------------------------------------------------------------------------------------------------------------------------------------------------------------------------------|
|                                                                                                                                                                                                                                                                                                                                                  | <p>31434-31613; 29915-29997;<br/>25214-25375; 23259-23332;<br/>LGUN_random_Scaffold7260:<br/>85338740; 5514-5738; 11544-<br/>11696; 11926-11989; 12187-<br/>12304; 13837-13988; 15855-<br/>15963; 16394-16478</p>                                                                                                                                                                                                                                                                                                                                                                                                                                                                                                                                                                                                                                                                                                                                                             |                                                                                                                                                                                                                                                                                                                                                                                                                                                                                                                                                                                                                                                                                                                                                                                                                                                                                                                                                                                                                                                                                                                                                                                                                                                                                                                                                                                                                                                                                                                                                                                 |
| <p><b>Thioester-containing protein (TEP)</b><br/>[<i>Biomphalaria glabrata</i>] (100%);<br/>Sequence ID: ACL00841.1</p> <p><u>Domains:</u><br/>-Signal peptide: 1-21<br/>-Proteinase-binding alpha-<br/>macroglobulins: 126-219/ 463-599/<br/>718-808/ 978-1241<br/>-Thiol ester: 929-958<br/>-Alpha-2-macroglobulin-receptor:<br/>1342-1426</p> | <p>LGUN_random_Scaffold4524:<br/>9507 9566; 9149-9332; 8894-<br/>8916; 4705-4867; 1865-1933;<br/>1610-1736;<br/>LGUN_random_Scaffold10725:<br/>6705-6750; 4397-4481; 2567-<br/>2681; 2042-2159; 1413-1527;<br/>LGUN_random_Scaffold9700:<br/>5915-6144; 3125-3226; 2777-<br/>2839; 709-909;<br/>LGUN_random_Scaffold8482:<br/>12144-12290; 10814-10917;<br/>10616-10675; 10307-10337;<br/>LGUN_random_Scaffold2300:<br/>37595-37626;<br/>LGUN_random_Scaffold76986:<br/>250-267;<br/>LGUN_random_Scaffold8482:<br/>10166-10290;<br/>LGUN_random_Scaffold7766:<br/>10058-10180; 9732-9849;<br/>LGUN_random_Scaffold45951:<br/>828-903;<br/>LGUN_random_Scaffold7766:<br/>277-407;<br/>LGUN_random_Scaffold53075:<br/>386-529;<br/>LGUN_random_Scaffold6063:<br/>31434-31613; 29915-29997;<br/>25214-25375; 23259-23332;<br/>LGUN_random_Scaffold7260:<br/>85338740; 5514-5738; 11544-<br/>11696; 11926-11989; 12187-<br/>12304; 13837-13988; 15855-<br/>15963; 16394-16478</p> | <p>MRMKLNLILFVFLVFQECQGKGYFISAPRNVVPGTAYDISVDILKQDIGNVTEAILQDYSFSIPEGPK<br/>SLLTANGTFSPGVRGTLSPIDFNLHCSYCRILLKGYNPLQFEQDIFIQISSDILSILIQTDKAIYKPK<br/>RVNFRILAAAYNLQLYGTGFHYEILDPYDNKINVLGVSQVGFVVEGFFDLSDDQPSFGTGWKINVRTETVS<br/>GEESQLFEVAEYDLPRFQVDVGLPPFALLSDTTLSGSVEAKYTFGQPVYGLVLLQIGENVDTIDKCNVNR<br/>KVTEISFEIKKENFSVPLEDIRRSVHLNEKKIKITAFVTEASTGIKLNSSVITYYGNRYQIKFLEMT<br/>PAVFKPGLQYAYVQVTTDPLPPTSDNLSLVYTSVYQMTVPDQELYSFSSFGSYPLPGQNMSLPAN<br/>GILSIDIDIPLNATSIDIKVSLNKQTTAEKRISKSYMSNYYLQLSLLSKLVKAESDVLIKITSTEIDS<br/>LAYERSRSDRVKSGVLELNGQREFNATFKVEPSWAPIAQLLMYYIRRDSNEVVTDSLAFNVEGMFKNKV<br/>NVAFKENETDINKNVSLELPADSDSQIYVLAVDXSVLLKGTNDXTPXKVKDSFXSFHKGAIPTDSNFA<br/>LSYSGSSIXEVFSNMGLVIATDLNIFAPFRPIALGRFPSSGFDRQXMMGAPXAMSFDDXAMXSASFEMD<br/>VTTSTKPVERVRSFFPESWLWTSVKSINGHATLTTTVPDTITSWIGSAFATNSDTGLGVAPTTSKLPGFR<br/>PFFGSLTYPRSVTRNEQFIVQATVFNYPVLDLMTVSLKENPFLTPVTPGPGNQASNIQVRANEQRTVYF<br/>SLSALIVGALDIEVSARSNMAADAIVRQILVRHEGAPVVYNNPILISLNNQSTFEKNIAFTLPDSLVE<br/>SHRIRVKVTGDLIGSTVQSLTLLTPTGCGEQSLVKFTPNIHIGRYLKATNQLSKELNKKIIDLLNNGY<br/>QRQLTYKRYDNGFSAFGNLDSSSTWLTALVVTSFEEAQEFIFVDKEIILKASMLLIDRQNLDDGSFNEFG<br/>KVLDRNTQGTAGPALTAFLVALLKAKELADVQYCKNNKCRYLLGNATLNATRNLERLMLADSIDDQ<br/>FSLAVTSYALAEAKSQAQSTFEKLLTFVKQEGGLEYSANSTVNNEELNRFINWRPRLQARPIDILIT<br/>SYAILTYSPLGRLDEALPSVRWLTQKNAQGGFVSTQDQTVVGLQALSTYGSKFRPDTNITYVSDMNT<br/>LTMNVKSDNALSQIQEIQNSQDFISITASGSLALLDIEYSFNVLKELSKPVFDVNTVLLDDKLDSEFNI<br/>MVCTKFLKHDGTGMVVQEVSPSGFVDPDLSTLGQVAGVKRSEKGSIVAIYFDKISGSSLCYSIVMTREA<br/>KVAKSQKSYVRTYDYEPANQATVFYQPRTLRDLRSTVCDVCLNCCP</p> |

|                                                                                                                                                                                                                                                                                                     |                                                                                                                                                                                                                                                                                                                                                                          |                                                                                                                                                                                                                                                                                                                                                                                                                                                                                                                                                                                                                                                                                                                                                                                                                                                                                                                                                                                                                                                                                                                                                                                                                                                                                                                                                                                                                                                                                                                                                                                 |
|-----------------------------------------------------------------------------------------------------------------------------------------------------------------------------------------------------------------------------------------------------------------------------------------------------|--------------------------------------------------------------------------------------------------------------------------------------------------------------------------------------------------------------------------------------------------------------------------------------------------------------------------------------------------------------------------|---------------------------------------------------------------------------------------------------------------------------------------------------------------------------------------------------------------------------------------------------------------------------------------------------------------------------------------------------------------------------------------------------------------------------------------------------------------------------------------------------------------------------------------------------------------------------------------------------------------------------------------------------------------------------------------------------------------------------------------------------------------------------------------------------------------------------------------------------------------------------------------------------------------------------------------------------------------------------------------------------------------------------------------------------------------------------------------------------------------------------------------------------------------------------------------------------------------------------------------------------------------------------------------------------------------------------------------------------------------------------------------------------------------------------------------------------------------------------------------------------------------------------------------------------------------------------------|
| <p><b>PREDICTED: CD109 antigen-like</b> [<i>Biomphalaria glabrata</i>] (100%);<br/>Sequence ID: XP_013071291.1</p> <p><u>Domains:</u><br/>-Proteinase-binding alpha-macroglobulins: 47-138/ 348-500/ 649-740/ 918-1168<br/>-Thiol ester: 869-898<br/>-Alpha-2-macroglobulin-receptor: 1271-1355</p> | <p>LGUN_random_Scaffold108:<br/>84237-84416; 83387-83461;<br/>82641-82779; 80795-80861;<br/>78882-79106; 78232-78463;<br/>76389-76589; 76048-76202;<br/>75142-75294; 51880-52111;<br/>41664-41787; 35799-36007;<br/>39854-39999; 39487-39666;<br/>39487-39666; 39487-39666;<br/>38763-38921; 36931-37116;<br/>35799-36007; 34930-35082;<br/>32766-32916; 31828-32071</p> | <p>MESLHFLFYSQLPADLPSSTYTLNVKSGGLTFDKSENLYNNKETS VFIQLNKAIFKPGDVTNFRVFGV<br/>YSDLKSYTDPIDISYDANSNKIKQWLKVTPTNGVITQELTSTQPVLDGWKISVDAGRTKEEKVFTVAE<br/>YVLPKFEVDVVTSPYALTTDNDVTVTVKSKYTYGKPVNGTADVLVKLHESFNTFDYSRALPVTTLQVPLN<br/>GEAKVIIIPMSQVKAIKANLNQHLVIVANVTESLTGNQMSGNGVTLYDKGVKLDFFASNPKTFFKALQY<br/>IAYLK<b>VTQPDGLPMTSTAEQVK</b>V SIRVTAELPGTTPPYWYVPPTESRDLPALSLAIPDNGLVAIPVDV<br/>PADAKDVHVTANFQGVSKELTLGKSHSPNSYIQLILKSGSVIKFQLSRGGIVKTGTVDANGQLVYQFS<br/>IPSDSSMAPNARIVLYVRADGEIVTDSISFDISGAFKNKVSIDLKTDVPEGDDVTVTKADPDSTAYC<br/>LAIDQSVLLKGGNDVTDNDVYTELKEYDTITESGSNKIIDCPMCKRRKRMWWPFPTYGGSDAQQIF<br/>SNAGVVVLTATVYHYQEPIHLNIPNFFQCGRSLNGQLRKRCAFSPVMNLVSSVSDPITLPVTETE<br/>TKTEDLQQPTKTRSNFVETWLVNSLDIGANGSASITATVPDITISWVASAFAINSASGLGVAPTQAHLRV<br/>FRPFVSLNLPYSVTRGEHLALQANVFNMTEDMQVRVTLAKSDNFFNIEIDANGAEVLKQVESVQDVMII<br/>KAGEAK<b>SVYFPIVPADLGK</b>IDIEVKAQSTKAADAVRRQLLVEAEGVPKI<b>VNPVVLIDLTEGK</b>TSFSK<b>TVD</b><br/><b>LTLPSNTVK</b>GSELARISAVGDLMGPTIAGLDSLLQMPTGCGEQTMIGLAPDVVYTDYLK<b>SVNQLSGDIQT</b><br/><b>K</b>ALSYMESGYQRELYKHTDGSFSAFGNSDASGSMWLTAFVTRVFKQAKAHYIIDDEVLIKAIQWMVSKQ<br/>NANGSFPEPGNVHKNMQGQAGSGVGLTLFVLISLLENKDLLVNTNAAGILVDEARQKALVYAEQEVAKT<br/>DDLILNMAAYAFQLANSSQVQTVLSKLEQKATVKDGRKYWHQPEQPK<b>TTNTWDYPNPTK</b>AVDIEMTSYA<br/>LLTYAARGNIVAGKSIMQWLTEQRNSNGGFSSTQDVTLALNALSEFAKQTSYNNFNQVITTQLNATTSYT<br/>FNIDKTNLLLLQSRETPNVPSQVKIDATGSGMALVQVAVSFNVESEIFETTFDLTVKLIETINNLVET<br/>CAKWLGS GPSSAMAVQEIGIPSGFEADIESIPQLDILKRIETQNKKVILYFDQIGTTPVCLNFRAVRTGL<br/>VAKSQPAAIRVYDYYEPR<b>NQVTA FYQS QILK</b>DSTVCDVCKECDNCV</p> |
| <p><b>PREDICTED: Heat shock protein 70 kDa cognate 4</b> [<i>Biomphalaria glabrata</i>] (100%);<br/>Sequence ID: XP_013082115.1</p> <p><u>Domains:</u><br/>-Heat shock proteins, Hsp70 chaperones: 6-612</p>                                                                                        | <p>LGUN_random_Scaffold253:<br/>223515:226430: BGLB007783</p>                                                                                                                                                                                                                                                                                                            | <p>MSKAPAVGIDLGTYSVGVFQHGKVEIANDQGNRTTSPYAFDNERLIGDAAKNQVAMNPENTVFDA<br/>KRLIGRRFDDPTVASDMKHWPFTVINEGGPKIRVEYKGEKTTFFPEEISSMVLTKMKETAAYLGKTVT<br/>DAVVTVPAYFNDSQRQATK DAGTISGLNVLRIINEPTAAAIA YGLDKKVGGERNVLIFDLGGGTFDVSIL<br/>TIEDGIFEVKSTAGDTHLGGEDFDNRMVNHFIQEFKRKHKKDISENKRAVRRRLTACERAKRTLSSTQA<br/>NIEIDSLFEGIDFYTSITR<b>ARFEELNADLFR</b>GTLEPVEKSLRDAKLDKAQVHEIVLVGGSTRIPKIQK<b>LL</b><br/><b>QDFFNGK</b>ELNKSINPDEAVAYGA AVQAAILHGDKSEEVQDLLLLDVAPLSLGIETAGGVM TALIKRNTTI<br/>PTK<b>QTQTFTTYS DNQPGVLIQVYEGE</b>RAMTKDNNLLGKFELTGIPPAPRGVPQIEVTFDIDANGILNVSA<br/>ADKSTGKENKITITNDKGRLSKEEIERMVNDAEYKNEDEKQKTRISAKNALESYAFHMKSTVEDEKLD<br/>KISADDKKIIIDKCNEIHWLDANQLADEEEFQHKQKEIEGVNCNPIITKLYQGMGGAGGMPDFSGAAGAG<br/>AQHSAGTGGGSGPTIEVD</p>                                                                                                                                                                                                                                                                                                                                                                                                                                                                                                                                                                                                                                                                                                                                                                                                                             |
| <p><b>Heat shock protein 60</b> [<i>Biomphalaria glabrata</i>] (100%); Sequence ID:<br/>ACL00842</p> <p><u>Domains:</u><br/>-Cpn60_TCP1 : 45-548</p>                                                                                                                                                | <p>LGUN_random_Scaffold791:<br/>163741:171751: BGLB013300</p>                                                                                                                                                                                                                                                                                                            | <p>MLRVASVFRSSATRQLVPM LCRHYAKDIKFGSDAR<b>ALMLQGVDLLADAVAVTMGPK</b>GRNVILEQSWGSPK<br/>ITKDGVTVAKGIDLKDKFQ NIGAKLVQDVANNTNEEAGDGTTSATV LARSIAKEGFERISRGANPVEIRR<br/>GVMLAVDAVVEHLKMSRQVTTPEEIAQVATISANGDKSIGELISSAMKKVGRDGVITVKDGKTLKDELE<br/>TIEGMKFD RGYISPYFMNTAKGAKCEFDALVLLSEKKISSIQSIIPALELANQAR<b>KPLLIVAEDVDGEA</b><br/><b>LSTLV LNR</b>IKVGLQVCAVKAPGFGDNRKNTLIDMAIATGGVVFGEENLYKLEDIQMQDFGNVGEVTVTK<br/>DDTLLMKGKGNKADIEKRIAQKDEIEISTSEYEKEKFGERLAKLSNGVAVLKIGGTSEVEVNEKKDRIN<br/>DALNATRAAVEEGIVPGGGTALLRCISVLDSVKTENEDQITGVNIIKALRVPALTIAQ NAGVDAHVVVE<br/>KVLNSSGDIGYDALNNEYVN LIEQGIIDPTKVVRTALVDAAGVASLLTTAEAVVVLDLPKEEKEAGMGGMM<br/>MGGMGGMGGMM</p>                                                                                                                                                                                                                                                                                                                                                                                                                                                                                                                                                                                                                                                                                                                                                                                                                                                                                                              |
| <p><b>Biomphalysin</b> [<i>Biomphalaria glabrata</i>] (100%);<br/>Sequence ID: AGG38744.1</p>                                                                                                                                                                                                       | <p>LGUN_random_Scaffold10:<br/>1097564:1099282: BGLB000137</p>                                                                                                                                                                                                                                                                                                           | <p>MFLQIFVAVTLVQVSSQCTYSSWWYSFDTPGQSKCNEINSYINALDRNDVNWADDALSNLEGVQCCRPP<br/>APWNNVEQQVYEDWTATLDSYTWAFCR<b>VGYFLQLGLYRS</b>DTGWPR<b>FKGYLFNLESAR</b>CTK PANHPLNYG<br/>TCQDIDVSSCMGRKGQCSCPGGYFLTGLYR<b>ADGDDLYFLK</b>KIRCCTPAAKPLEMDEKSKIQTRIMDTTLW<br/>NMATLAHYMGYGCYGC HGLAVGEDFTR<b>NGFTWAADTR</b>TFWGWKCEGDKNGERLNLVFGDWGFAVKEIY</p>                                                                                                                                                                                                                                                                                                                                                                                                                                                                                                                                                                                                                                                                                                                                                                                                                                                                                                                                                                                                                                                                                                                                                                                                                                        |

|                                                                                                                                                                                                                                                                                                                                                                                      |                                                                                                                                                                                      |                                                                                                                                                                                                                                                                                                                                                                                                                                                                                                                                                     |
|--------------------------------------------------------------------------------------------------------------------------------------------------------------------------------------------------------------------------------------------------------------------------------------------------------------------------------------------------------------------------------------|--------------------------------------------------------------------------------------------------------------------------------------------------------------------------------------|-----------------------------------------------------------------------------------------------------------------------------------------------------------------------------------------------------------------------------------------------------------------------------------------------------------------------------------------------------------------------------------------------------------------------------------------------------------------------------------------------------------------------------------------------------|
| <p><u>Domains:</u><br/>-Signal peptide: 1-17<br/>-Aerolysin: 195-531</p>                                                                                                                                                                                                                                                                                                             |                                                                                                                                                                                      | <p>GKSVIEDLQAESVDSGVLYNRASSPVTESIERSKTIQETITHSTTSTFTNSHGLGVELEFEIASVKGKAS<br/>YKTRFEYSTSTTNSKSISETQGFTKQSSITLGPMEGAKYEVIMSKSR<b>TTVPYTAIITTK</b>FSTEMKGFLR<b>W</b><br/><b>EDGNGNFHQDYRTNSGRPTFNRYRFGDSSVPFYK</b>ALKKQSDNNEGVMMWGMLFQKFPDARRVTNRLTDEQ<br/>YQFTLAGKLEKVEGTSVNVKWEKMKLNRRDVSNGNDEPGSNITTYIAASGPADKPAVVEYPKVNLLNKEPF<br/>KPIEIPVTEVKV</p>                                                                                                                                                                                               |
| <p><b>Dermatopontin 2</b> [<i>Biomphalaria glabrata</i>] (100%); Sequence ID: AAZ80786</p> <p><u>Domains:</u><br/>-Dermatopontin: 11-156</p>                                                                                                                                                                                                                                         | <p>LGUN_random_Scaffold8114:<br/>1204:2972: BGLB013420</p>                                                                                                                           | <p>MASVASAAYVNDWDQPFNFRCPDGQVVSIVSSIHNNRREDRRWEFLCRSTRQTHSCTDSGYVNDQDFGLV<br/>YTCPGNKVMGVHSHYHNNRREDRRFGFYCCDVQGSTPRDCYTTNYVNDWDEK<b>LTLVVPEGTAVK</b>AAAYSHH<br/>DNRREDRRWQFQICTL</p>                                                                                                                                                                                                                                                                                                                                                               |
| <p><b>PREDICTED: Millepora cytotoxin-1-like</b> [<i>Biomphalaria glabrata</i>] (100%); Sequence ID: XP_013061974.1</p> <p><u>Domains:</u><br/>-Signal peptide: 1-24<br/>-Dermatopontin: 29-174</p>                                                                                                                                                                                   | <p>LGUN_random_Scaffold7789:<br/>3993-4096, 5800-6107, 8666-9418</p>                                                                                                                 | <p>MPRMERYISIVLCSLLVLTNVHCVTYQTEEQEDWTECAPNHVITDIVSDFFSDDLWNITCAPIRPKI<br/>NITECVWSNYHNAPQYDFLFDPCPMNSILAGISSFHRSRDRVFK<b>FYCCTNKDYLHVACQHHTLTINNAK</b>GFI<br/>SFR<b>VPEAMYVRGLFSSYDSTAGDRLYRIHLCKLDPADPTVECPTELTQAVTKLVNQETPLLESESED</b></p>                                                                                                                                                                                                                                                                                                       |
| <p><b>PREDICTED: uncharacterized protein LOC106068782</b> [<i>Biomphalaria glabrata</i>] (100%); Sequence ID: XP_013083706.1</p> <p><u>Domains:</u><br/>-Signal peptide : 1-20<br/>-Zn-dependent metalloprotease, ADAM-like or reprolysin-like subgroup: 31-228</p> <p><b>PREDICTED: ADAM family mig-17-like isoform X2</b> [<i>Biomphalaria glabrata</i>] (42%); XP_013069827.1</p> | <p>LGUN_random_Scaffold286:<br/>44298-44384; 42897-42974;<br/>39464-39607; 36011-36117;<br/>34918-35050; 34015-34151;<br/>32322-32458; 31272-31438;<br/>29557-29654; 27862-28646</p> | <p>MVRRIAVLLCLSILVMTSSCQVQNLVAEYVVVEDSTVQSYAQSSPAQTIAEATNSLRNDIDLVTQTN<br/>VLLSSLVQYGINIEVRKR<b>KVDILSTNIINTFLETTYIADSSAAK</b>ASFQSWLNLQNAAYSTLNYDFAVLWT<br/>GFDLFGTSGIFENSITSAAMCK<b>STGVSVMEFDPTAR</b>DIVATAKIIAYLLSSLNDGITSTYIMAIINAPD<br/>DANRWFYSNSSAQSIKEFVALPRASCLLSTNSASVKPAVYATYTGSLDPPVICQRSLNDSRSYMCK<b>SL</b><br/><b>PQIYNNQPPK</b>GNAVCSQIYCRIPKTSICTPAFTSDGMICENQKRCTKGQCSSYPTSPVDPNCLWGDQKTL<br/>DYPLIPFSGTCKPFLDTYGAANCYTRPINETCCNTCK<b>TYNSGIPGCEYGDKSSACVLF</b>TQAQVCPYKNT<br/>LCCNYCRNYVGRRSVPEGGYPELTPSPQQNVTEVPVVG DYLGKRR</p> |
| <p><b>PREDICTED: uncharacterized protein LOC106068784</b> [<i>Biomphalaria glabrata</i>] (100%); Sequence ID : XP_013069827.1</p> <p><u>Domains:</u><br/>-Signal peptide: 1-21<br/>-Disintegrin and metalloproteinase: 90-333</p>                                                                                                                                                    | <p>LGUN_random_Scaffold286:<br/>70002-70112; 67477-67586;<br/>65313-65458; 63714-63819;<br/>62425-62557; 60967-61102;<br/>60466-60602; 58410-58575;<br/>53454-54138</p>              | <p>MWSPAVILCFALLVLTKSCQGQTYVLEAYIVADDSAVQNQVREIATTESYSVKYTKAVANLRKDIDYIVT<br/>QVNVLLGSLSQNGVTMEMRIRRLDILSGNIITTFMPGTSYVVDSIVARNFQNWLNQAYANINYDFAL<br/>LWTGFNLYGTSGLDNSITNVAQMCGAAGITVVEFDPTAREAVATAR<b>AIGNLLGASNDGALSTSIMAIIN</b><br/><b>APGDVNR</b>WSYSTCSASSIKDFIKLPKASCLLTNIASITKPSVTFSSYTGNLFDPIICQALNDSRTYMC<br/><b>KSLPQIYNNLLPK</b>GNAVCGQIFCRIPNTMTCTPVYTS DGLVCDNQKRCSLGQCSSYSTPVVDNTCVFGDQ<br/>KKLEFPAPVPFYGTCAQAFISQYGA VNCYSSPINESCCSTCKSYNNGRVGCEYGDRLDCVKYTKASICPTY<br/>KNTLCCGYCYNVYVGRSPSDEPVPKLNITLPIKIQEPDIMPFEFNSQP</p>         |

|                                                                                                                                                                                                                                                             |                                                                                                                                         |                                                                                                                                                                                                                                                                                                                                                                                                                                                                                                                                                                                                                                                                                           |
|-------------------------------------------------------------------------------------------------------------------------------------------------------------------------------------------------------------------------------------------------------------|-----------------------------------------------------------------------------------------------------------------------------------------|-------------------------------------------------------------------------------------------------------------------------------------------------------------------------------------------------------------------------------------------------------------------------------------------------------------------------------------------------------------------------------------------------------------------------------------------------------------------------------------------------------------------------------------------------------------------------------------------------------------------------------------------------------------------------------------------|
| <p><b>PREDICTED: ADAM family mig-17-like isoform X2 [Biomphalaria glabrata]</b> (44%) XP_013069827.1</p>                                                                                                                                                    |                                                                                                                                         |                                                                                                                                                                                                                                                                                                                                                                                                                                                                                                                                                                                                                                                                                           |
| <p><b>PREDICTED: ADAM with thrombospondin motifs 9-like [Biomphalaria glabrata]</b> (100%)<br/>Sequence ID: XP_013075983.1</p> <p><u>Domains:</u><br/>-Metallopeptidase :36-152</p>                                                                         | <p>LGUN_random_Scaffold16032: 213-334; 1737-1893; 3892-4003; 5778-5914; 7097-7228; 10218 -10401</p>                                     | <p>MYGVNVEARIKKLDILSSNIIPSSALLPGTENVAPSENAMATFENWLVAQNSYNNIQYDFAIFWTGYDLR<br/>DAEDLEGRTHIGTICDSRYAVSMSEFDRTYHTALLTAQQISELLGSQHDGVLSSITNRWFFSSAVAGDIK<br/>NKLASLSPNCLLTTSATSTKPFVEVYEDGHILNPDITCQRRNLNYTNSYMCTGWHLYNQATGGDRVCTT<br/>IYCNEMDEVNCKRIETPEGMICESGKRCRHGSCVVDIHTPTNIDPSCVFGDQKEVTLGNFTGTCHEYIRM<br/>FSARVCYNSFVNQVCCMSCKAHTGT</p>                                                                                                                                                                                                                                                                                                                                               |
| <p><b>PREDICTED: Serpin B6-like protein [Biomphalaria glabrata]</b> (100%);<br/>Sequence ID: XP_013077880.1</p> <p><u>Domains:</u><br/>-Signal peptide: 1-27<br/>-low complexity: 50-61/ 63-76<br/>Serpin: 92-458</p>                                       | <p>LGUN_random_Scaffold1827: 27197-27439; 31889-32190; 39463-40100; 39670-40571; 39564-40002</p>                                        | <p>MNTRSRLVVLVFLVLLAVIALTKRADAGDEQELSAAKNEISRYRRTLLSRNRGGNRDRDRNRTKQKGGKGN<br/>NSKKQKLSPEERIGVANSHVALNVFTSLYPSINSNTIFSPHSLHTALAMTMLGAKKDTKKEFYISLGLKA<br/>AKVGKSEVHGIIYKLLQSLSSRPDIILSYANSVYVKSGLLKKKFRGLTTHYHAKVDNFMNMTDPEGPER<br/>SINAWVANATRGKISDILKKGVDNINTAMIIINAVYLNASWAIQFQTFNTKPKPFYSLNSGVQTIPTMHI<br/>VQFYNYANHHDEVIELNFNGLAMYLPSAKSNLNQLLQNMKASSALANPFDELLTGLERRNLNLSL<br/>PTFKIQSDVIDLVPALKNLGLKAFNSSQADFQKQKLFQKAVISVNETGCEAAAATDVIFGL<br/>KSSRPTPALEVKKVDRPFLYVIRSKAQKVVLFMGTFVGV</p>                                                                                                                                                                                        |
| <p><b>PREDICTED: 14-3-3 protein epsilon-like [Biomphalaria glabrata]</b> (100%);<br/>Sequence ID: XP_013082420.1</p> <p><u>Domains:</u><br/>-14-3-3: 4-245</p>                                                                                              | <p>LGUN_random_Scaffold260: 178321:180720: BGLB007883</p>                                                                               | <p>MADREDNVYQAKLAEQAERYDEMVSMMKVAQQDTELVEERNLLSVAYKNVIGARRASWRIVSSLEQKD<br/>EGKVSEKQITREYRKQIESELNSICHDLVSLVIDNLLIPNAATGESKVFYKMKGDYHRYLAEFATGND<br/>RKEAAENSLVAYKAASDISMTELAPTHPIRLGLALNFSVFYIEILNSPDRACRLAKAAFDDAIAELDTLS<br/>EESYKDSTLIMQLLRDNLTWTSMDMQGENDGGEEQQTVDIEGEDAS</p>                                                                                                                                                                                                                                                                                                                                                                                                        |
| <p><b>PREDICTED: transforming growth factor-beta-induced protein [Biomphalaria glabrata]</b> (100%);<br/>Sequence ID: XP_013079848.1</p> <p><u>Domains:</u><br/>-Signal peptide: 1-17<br/>-FAS1 (fasciclin-like): 59-158/<br/>195-296/ 376-476/ 513-614</p> | <p>LGUN_random_Scaffold209: 176383-176605; 177276-177462; 179882-180008; 180681-180831; 188684-188904; 189702-189891; 192064-192299</p> | <p>MKYFCLVITVVISLTKGQTVTPFPDVVSALTASGHFETFLDLLKPSGLLERINSSSHFTLFAPTDDAFK<br/>LPADTFNALKSDPIQLALVLGYHVVLSSSFKAGTQQDVLKSSNGLPIRINTYSLIHSNAASGVNITLKN<br/>IPVVHGYIQGVNTVNLNPPIGNIVQIAMNRTDLKFTTSWVVSNNLVQFFLNDDDVTFLVFNDDAIKLSPT<br/>TLDYLNHPSALADVLKYHVMSDYTLFTIGMTHSMTLKSADQHDLMLLEDGNGGLFVNHAKIVERDIA<br/>CIEGVLHIIDNVLIPPHVLVAIQDTSVAVGKQKQIMKSIYLLAVLLLKRGSQTTAPPLPDVEDVLAAD<br/>SRFTTFYQLLKTDDLLEINETNHFTIFAPTDAFAKLPAGSLDALKADVDKLKETIGYHVVLNSSYHVH<br/>GSQQDSILKSSTQLPIRINTYSLAHTVTAEGVNITIRNISVNHGYIQGIDGVMKPPTGNVVDLGTTRSDI<br/>STFESLLVKANQTAYFTSDHSTTLFIPTDDAFKLSAETLDYLNHHISDLTDVLRFHVYVKQYSLSLGMK<br/>HAFTIQSADHSHDYLMLEDDNGGMRVNQAKIIEKDISSINGVIHIIIDDVLIIPRVLVAIRDQSIVVG</p> |
| <p><b>PREDICTED: neo-calmodulin-like protein [Biomphalaria glabrata]</b></p>                                                                                                                                                                                | <p>LG27_random_Scaffold161: 16903:18554 :BGLB001498</p>                                                                                 | <p>MAEQLTEETIAEFKEAFSLFDKDGDTITTKELGTVMRSLGQNPTAEALQDMINEVDADGNGTIDPFEFL<br/>TMMARKMKDTEELREAFRVFDKDGNGFISAAELRHVMTNLGKLTDEEVDDEMIREADTDGQGQVNYD<br/>GECHSASYHMLLHLPRGFHPPQRSS</p>                                                                                                                                                                                                                                                                                                                                                                                                                                                                                                        |

|                                                                                                                                                                                                                                                                                                                       |                                                                                                                  |                                                                                                                                                                                                                                                                                                                                                                                                                                                                                                                                              |
|-----------------------------------------------------------------------------------------------------------------------------------------------------------------------------------------------------------------------------------------------------------------------------------------------------------------------|------------------------------------------------------------------------------------------------------------------|----------------------------------------------------------------------------------------------------------------------------------------------------------------------------------------------------------------------------------------------------------------------------------------------------------------------------------------------------------------------------------------------------------------------------------------------------------------------------------------------------------------------------------------------|
| <p>(100%); Sequence ID: XP_013067017.1</p> <p><u>Domains:</u><br/>- EF-hand, calcium binding motif: 12-40/ 48-76/ 85-113/ 121-150</p>                                                                                                                                                                                 |                                                                                                                  |                                                                                                                                                                                                                                                                                                                                                                                                                                                                                                                                              |
| <p><b>PREDICTED: GATA zinc finger domain-containing protein</b><br/>[<i>Biomphalaria glabrata</i>] (100%); Sequence ID: XP_013076718.1</p> <p><u>Domains:</u><br/>-Signal peptide: 1-25<br/>-Cu-Zn SOD : 352-497</p> <p><b>Superoxide dismutase (Cu-Zn)</b><br/>[<i>Megathura crenulata</i>]<br/>CAF22060.1 (40%)</p> | <p>LGUN_random_Scaffold1689: 27317 -27807; 36361 -36477; 37754-38211; 52024-52107; 66296-66541; 76688 -76877</p> | <p>MKPMQMFNLRVLFVSVILVILSVHCQKFSKKGKHLNEQYKPNLIKENKFINIGGNVSLNDTIEQNITSE ETQDNKENMNETISLKTVNAKENVTSVETQMTSQIEFLNASNHISDLDIVNITQDETLSNSSESYKKPS TSCDCHVHHLMDKLLKDLSSMRTYVKERHNPIQIHQYKGEKIKSSQMSEPSKDNDKELGKGTQDQSKS YSKQLNKNDDDLQDQHVHVHSGNLRHNHNSKYNHHSLSLNQDLRRNYQNGHSNVKYKPKNTKFHNQITHD HYEPSVSRQRHFQVQETHIHLNIQVSGRNEEDAKEKERHKMSVEQIKKEGLEKDLTAKNEIPIFARCDM KTYNSGHNISGTVFLHQLPGQYLKVEVQLHGFSVQSNHRSTDIKEEKQFLNLSNDISLNKQLHGFHVHE FGDSKKGCHSMGGHFNPEGVHHGYRNNSHGHVGDWGNIDVDMYGDSSNSNFTVQAASLIGPNSILGRGIVV SLHAITHKELLECEKVDG</p>        |
| <p><b>PREDICTED: uncharacterized protein LOC106059379</b> [<i>Biomphalaria glabrata</i>] (100%); Sequence ID: XP_013072448.1</p> <p><u>Domains:</u><br/>-Copper type II, ascorbate-dependent monooxygenase: 1-100</p>                                                                                                 | <p>LGUN_random_Scaffold1196: 16772-16869; 15959-16119; 14884-15048; 11587-12745</p>                              | <p>MSIQLYRNKVLIIYNLTNDELYNLDAPVTHYPKQHVQILPGDEIITRCVYNTTSAATSDPSGQVQGEMCYG YLNVYPQSALRIPDGTCVASTLSYCERSQSIPVDGCDWKTFLSYGDLELIDMYCQLRSSCQLQGSKRV QSSQNNASSPSHDFSSILSIDDTSISMKSNVTDGRVSKGSTDNISATQNNNTDFNSQSIPSDNSIVPN ISLFDVNTQNTTYSSSLIEANTTSVNHSASLADASIVKILSSDSIGNINSQVENYFNETIKHFAGKMSVN QTASNDLDLLETQRQDTSNITSTAHLGGVQLNATLSAKDKVAETRNSSNGLTSTYHNSDTGHISTTHI NNKGQISSTSVDLGHVSTSFIDSNGAICTVYIDSNVSTSYNDGNGRVSTTHIDRKGQISTHLDSDG HISIRIDSKGLVSTIRTDSKGRNSKRDDTSVEVGSYTYGDSIGHVEPKPSVRNETASQSLELFSNPKD IFHNKAISVHKVACYLSFYMCILQIIVTLRL</p> |
| <p><b>PREDICTED: uncharacterized protein LOC106079481</b> [<i>Biomphalaria glabrata</i>] (100%); Sequence ID: XP_013096101</p> <p><u>Domains:</u><br/>-EF-hand, calcium binding motif : 44-72/ 105-133</p> <p><b>Calcium binding protein 1</b><br/>[<i>Biomphalaria glabrata</i>] (37%); Sequence ID: AAV91525.1</p>  | <p>LGUN_random_Scaffold6449: 3374-3477; 6563-6717; 7143-7387; 8008-8087</p>                                      | <p>MMFLLALIPALALAQTADLTVTIDGVFDALDYDFDNEIARDELTKFFQTYDANHDNRISRADYTAID ENFPNETHDPIITNAYRNLFVDVLDNNKNGFIEPNLDLDAVFRNADDNNNGVVTRAEFHKYFNEIFFLVLG</p>                                                                                                                                                                                                                                                                                                                                                                                           |
