# Supplementary material for: Proteomic analysis of Biomphalaria glabrata plasma proteins with binding affinity to those expressed by early developing larval Schistosoma mansoni
Source: PubMed Central journal article supplement (PMC5433772; doi:10.1371/journal.ppat.1006081), 2017-05-16
Supplement: ppat.1006081.s007.pdf [file ppat.1006081.s007.pdf]

**S6 Table. Protein sequences, identified domains and genomic locations in VectorBase of other immune-related NMRI and BS-90 *Biomphalaria glabrata* plasma proteins eluted from larval transformation protein (LTP) affinity columns.**

| Protein ID                                                                                                                                                                                                                                                                                                                    | Scaffold No.                                                                                                                                                                                                                                                                                                                                                                                                                                                                                                                 | Predicted Protein Sequence                                                                                                                                                                                                                                                                                                                                                                                                                                                                                                                                                                                                                                                                                                                                                                                                                                                                                                                                                                                                                                                                                                                                                                                                                                                                                                                                                                                                                                                                                                                                                           |
|-------------------------------------------------------------------------------------------------------------------------------------------------------------------------------------------------------------------------------------------------------------------------------------------------------------------------------|------------------------------------------------------------------------------------------------------------------------------------------------------------------------------------------------------------------------------------------------------------------------------------------------------------------------------------------------------------------------------------------------------------------------------------------------------------------------------------------------------------------------------|--------------------------------------------------------------------------------------------------------------------------------------------------------------------------------------------------------------------------------------------------------------------------------------------------------------------------------------------------------------------------------------------------------------------------------------------------------------------------------------------------------------------------------------------------------------------------------------------------------------------------------------------------------------------------------------------------------------------------------------------------------------------------------------------------------------------------------------------------------------------------------------------------------------------------------------------------------------------------------------------------------------------------------------------------------------------------------------------------------------------------------------------------------------------------------------------------------------------------------------------------------------------------------------------------------------------------------------------------------------------------------------------------------------------------------------------------------------------------------------------------------------------------------------------------------------------------------------|
| <p><b>PREDICTED: Lipopolysaccharide-binding protein-like</b> [<i>Biomphalaria glabrata</i>] (100%);<br/>Sequence ID: XP_013070669.1</p> <p><u>Domains:</u><br/>-Bactericidal permeability-increasing protein (BPI)/LPS-binding protein (LBP): 1-193/ 180-384</p>                                                              | <p>LGUN_random_Scaffold1023:<br/>50441-50613; 50252-50331;<br/>49394-49526;46627-46718;<br/>45543-45623; 43433-43591;<br/>40841-40951; 39401-39593</p>                                                                                                                                                                                                                                                                                                                                                                       | <p>MLLINLLGHYFNSFRLENVAIPDIDMSFNPVQRGLTMNLRNLGVDVLLDYRVRYKLLFVPISNSGGVSVN<br/>FRGVELTATVGIQDFEDTSPRLVSRSCSAAGDFNINFGSMAWLLNLLKGLFRGKIRDITIRSKICKDKVT<br/>EAINTQGADKLR<b>QIPLESADIADKFVIDYR</b>LLSPVLFTDSYLETQHKKLYKRGTLGYAAHTHGYLQYVISP<br/>DKLPAQSKGFLNTPCPSACAGTLIPLLAEKYPNSFVLTISSSKAPDFNITSNGLGLTYGLTDLSTTS<br/>ASAVVTANVVISIAGAAFVRNDR<b>IVGNVAQFR</b>TVLADIDSQRLISLYTFQISSINK<b>ALDDGMNMVVIPQL</b><br/><b>NAVGDGTGIALPVLKDLTFQNPR</b>IVYQDKSVLISTNVQYQGIV</p>                                                                                                                                                                                                                                                                                                                                                                                                                                                                                                                                                                                                                                                                                                                                                                                                                                                                                                                                                                                                                                                                                                                  |
| <p><b>Thioester-containing protein 1.5 (TEP1.5)</b> [<i>Biomphalaria glabrata</i>] (100%); Sequence ID: ADE45333</p> <p><u>Domains:</u><br/>-Signal peptide: 1-21<br/>-Proteinase-binding alpha-macroglobulins: 126-219/463-599/718-808/978-1241<br/>-Thiol ester: 929-958<br/>-Alpha-2-macroglobulin-receptor: 1342-1426</p> | <p>LGUN_random_Scaffold4524:<br/>9507-9566; 9149-9332; 8894-8916;<br/>4705-4867; 1865-1933; 1610-1736;<br/>LGUN_random_Scaffold10725:<br/>6705-6750; 4397-4481; 2567-2681;<br/>2042-2159; 1413-1527;<br/>LGUN_random_Scaffold9700:<br/>5915-6144; 3125-3226; 2777-2839;<br/>709-909;<br/>LGUN_random_Scaffold8482:<br/>12144-12290; 10814-10917;<br/>10616-10675; 10307-10337;<br/>LGUN_random_Scaffold2300:<br/>37595-37626;<br/>LGUN_random_Scaffold76986:<br/>250-267;<br/>LGUN_random_Scaffold8482:<br/>10166-10290;</p> | <p>MRMKNLNLILVFYLVFQEQCGGKYFISAPRNVPVPGTAYDISVDILKQDIGNVTEAILQDYSFSIPEGPK<br/>SLLTANGTFSPGVRGTLSPIDFNLHCSYCRILLKGYNPLQFEQDIFIQISSDILSIQTDKAIYKPKKE<br/>RVNFRILAVYYNLQLYTGTFFHYEILDYDNDKINVLVSGVSGTFFGVVEGFFDLSDQPSFGTWKINVR<b>TETVS</b><br/><b>GAESQFFEVAEYDLPR</b>FQVDVGLPPFALLSDDTTLVSGSVEAKYTFGQPVYGLVLLQIGENVDTIDKCNVNR<br/>KVTEISFEIKGKGNFVPLEDIRRSVHLNEKKIKITAFVIEASTGIKLNSSVITYYGNRYQIKFLEMT<br/>PAVFKPGLQYTAYVQVTPDGLPPTESNLSVYTSVYQMTVPDQELYSPPSFGSYPLPGQNMSLPAN<br/>GILSIDIDIPLNATSIDIKVSLNKQTTAEKRISK<b>SYMSNNYLQLSLLSKLVKAESDVLIKITSTEIDS</b><br/><b>LAYEIR</b>SRSDHVKSGVLELNQREFNATFK<b>VGPSWAPIAQLLMYYIR</b>RDSNEIVTDSLAFNVEGMFENKV<br/>NVAFKENETDINKNVSELSADSDSQIYVLAVDQSVLLKGTNDLTPNKVKDSFISKFHKGEVPTDSNFA<br/>LSYSGSSINEVFSNMGLVIATDLNIFAPFRPIALGRFPSSGFDRQGMGAPMAMSRDDNAMESASFEMD<br/>VATSTKPVER<b>VRSFFPESWLWTSVK</b>SINGHATLTTTVPDTITSWIVSAFATNSDTGLGVAPTTSKLR<b>VFR</b><br/><b>PPFVSLTYPR</b>SVTRNEQFIVQATVFNYLPVDMVTVSLKENPFLTPIPGPNQASNIQVRANEQGIVYF<br/>SLSALTVGSLDTEVSAR<b>SNMAADAIVR</b>QILIKHEGAPVVYNNPILINLSNNQSTFEK<b>NIAFTLPDSLVE</b><br/><b>SQR</b>IRVKVTGDLIGSTVQSLTLLPTGCGEQSLVK<b>FTPNIHIGRYL</b>K<b>ATNQLSEELNKKIIDLLNDGY</b><br/><b>QR</b>QLTYKRYDNGFSAFGNYSSTWLTALVVTSFAEAQEFIFVDKEILKASMLLIDR<b>QNIDGSFNEFG</b><br/><b>KV</b>LDRNTQGTTAGPALTAFLVALLKAKELADVQDCKNNNKCRYLLGNATLNATRNLERLMLADSIDD<br/>QFSLAVASYALAEAK<b>SQLAQSTFEK</b>LLTFVKQEGGLEYSANSTVNNEELNRFINWRPRLQARPIDILI<br/>TSYAILTYSSLGR<b>LDEALPSVR</b>WLTLLQNAQGGFVSTQDQTVVGLQALSFYGSKSRPDTNITIYVSDMNT<br/>HLTMMNVNSENALSQIQEIQNSQDFSITASGSLALLDIEYSFNVLKELSKPVFDANTVLLDDKLDLDFN</p> |

|                                                                                                                                                                                                                                                                                                                                                                                |                                                                                                                                                                                                                                                                                                                                                                                                                                                                                                                                                                                                                                               |                                                                                                                                                                                                                                                                                                                                                                                                                                                                                                                                                                                                                                                                                                                                                                                                                                                                                                                                                                                                                                                                                                                                                                                                                                                                                                                                                                                                                                                                                                                                                                                                                                                                                                                                                                                                                                                  |
|--------------------------------------------------------------------------------------------------------------------------------------------------------------------------------------------------------------------------------------------------------------------------------------------------------------------------------------------------------------------------------|-----------------------------------------------------------------------------------------------------------------------------------------------------------------------------------------------------------------------------------------------------------------------------------------------------------------------------------------------------------------------------------------------------------------------------------------------------------------------------------------------------------------------------------------------------------------------------------------------------------------------------------------------|--------------------------------------------------------------------------------------------------------------------------------------------------------------------------------------------------------------------------------------------------------------------------------------------------------------------------------------------------------------------------------------------------------------------------------------------------------------------------------------------------------------------------------------------------------------------------------------------------------------------------------------------------------------------------------------------------------------------------------------------------------------------------------------------------------------------------------------------------------------------------------------------------------------------------------------------------------------------------------------------------------------------------------------------------------------------------------------------------------------------------------------------------------------------------------------------------------------------------------------------------------------------------------------------------------------------------------------------------------------------------------------------------------------------------------------------------------------------------------------------------------------------------------------------------------------------------------------------------------------------------------------------------------------------------------------------------------------------------------------------------------------------------------------------------------------------------------------------------|
|                                                                                                                                                                                                                                                                                                                                                                                | <p>LGUN_random_Scaffold7766: 10058-10180; 9732-9849;<br/>         LGUN_random_Scaffold45951: 828-903;<br/>         LGUN_random_Scaffold7766: 277-407;<br/>         LGUN_random_Scaffold53075: 386-529;<br/>         LGUN_random_Scaffold6063: 31434-31613; 29915-29997; 25214-25375; 23259-23332;<br/>         LGUN_random_Scaffold7260: 8533-8740; 5514-5738; 11544-11696; 11926-11989; 12187-12304; 13837-13988; 15855-15963; 16394-16478</p>                                                                                                                                                                                               | <p>IMVCTKFLMKHDTGMVVQELSIPSGFVDPDLSTLGQVAGVKRSEKSGSIVAIYFDKISGSSLCYSIVMTRE<br/>         AKVAKSQKSYVRTYDYYEPANQATVFYQPRTLRDSTVCDVCLNCCP</p>                                                                                                                                                                                                                                                                                                                                                                                                                                                                                                                                                                                                                                                                                                                                                                                                                                                                                                                                                                                                                                                                                                                                                                                                                                                                                                                                                                                                                                                                                                                                                                                                                                                                                                       |
| <p><b>Thioester-containing protein (TEP)</b><br/> <i>[Biomphalaria glabrata]</i> (100%);<br/>         Sequence ID: ACL00841.1</p> <p><u>Domains:</u><br/>         -Signal peptide: 1-21<br/>         -Proteinase-binding alpha-macroglobulins: 126-219/463-599/718-808/978-1241<br/>         -Thiol ester: 929-958<br/>         -Alpha-2-macroglobulin-receptor: 1342-1426</p> | <p>LGUN_random_Scaffold4524: 9507-9566; 9149-9332; 8894-8916; 4705-4867; 1865-1933; 1610-1736;<br/>         LGUN_random_Scaffold10725: 6705-6750; 4397-4481; 2567-2681; 2042-2159; 1413-1527;<br/>         LGUN_random_Scaffold9700: 5915-6144; 3125-3226; 2777-2839; 709-909;<br/>         LGUN_random_Scaffold8482: 12144-12290; 10814-10917; 10616-10675; 10307-10337;<br/>         LGUN_random_Scaffold2300: 37595-37626;<br/>         LGUN_random_Scaffold76986: 250-267;<br/>         LGUN_random_Scaffold8482: 10166-10290;<br/>         LGUN_random_Scaffold7766: 10058-10180; 9732-9849;<br/>         LGUN_random_Scaffold45951:</p> | <p>MRMKNLNLIFVFLVFQECQGKGYFISAPRNVVPGTAYDISVDILKQDIGNVTVEAILQDYSFSIPEGPK<br/>         SLLTANGTFSPGVRGTLSPIDFNHCSYCRILLKGYNPLQFEQDIFIQISSDILSIQTDKAIYKPK<br/>         RVNFRILAAAYNLQLYTGTFFHYEILDYDNKINVLGSGTGFVVEGFFDLSDQPSFGTWKINVRT<b>TETVS</b><br/> <b>GEESQLFEVAEYDLPRFQVDVGLPPFALLSDTTLSGSVEAKYTFGQPVYGLVLLQIGENVDTIDKCNVNR</b><br/>         KVTEISFEIKGKENSFVPLEDIRRSVHLNEKKIKITAFVTEASTGIKLNQSSVITYYGNRYQIKFLEMT<br/>         PAVFKPGLQYTAYVQVTPDGLPPTDSNLSLSVYTSVTYQMTVPDQELYSPSSFSGSYPLPGQNMSLPAN<br/>         GILSIDIDIPLNATSIDIKVSLNKQTTAEKRISK<b>SYSMSNNYLQLSLLSKLVKAESDVLKITSTEIDS</b><br/> <b>LAYEIR</b>SRSDRVKSGVLELNGQREFNATFKVEPSWAPIAQLLMYYIRDSNEVVTDLAFNVEGMFKNKV<br/>         NVAFKENETDINKNVSLELPADSDSQIYVLAVDXSVLLKGTNDXTPXKVKDSFXSFXHKAIPDTSNFA<br/>         LSYSGSSIXEVFSNMGLVIATDLNIFAPFRPIALGRFPSSGFDRQXMMGAPXAMSFDDXAMXSASFEMD<br/>         VTTSTKPVER<b>VRSFFPESWLWTSVK</b>SINGHATLTTPDTITSWIGSAFATNSDTGLGVAPTTSKLPGFR<br/>         PFFGSLTYPRSVTRNEQFIVQATVFNYPVLDLMVTVSLK<b>ENPFLTPTVTPGPGNQASNIQVR</b>ANEQRTVYF<br/>         SLSALIVGALDIEVSAR<b>SNMAADAIVR</b>QILVRHEGAPVVYNNPILISLNNQSTFEK<b>NIAFTLPDSL</b>VP<br/> <b>SHRIRVKVTGDLIGSTVQSLTLLPTGCGEQSLVKFTPNIHIGR</b>YLKATNQLSKELNKK<b>IIDLNNNGY</b><br/> <b>QRQLTYKRYDNGFSAFGNLDSSSTWLTALVVTSF</b>AEAEQEFIVDKEIILKASMLLIDR<b>QNL</b>DGSF<b>NEFG</b><br/>         KVLDRNTQGTAGPALTAFLVALLKAKELADVQYCKNNKCRYLLGNATLNATRNLERLMLADSIDDQ<br/>         FSLAVTSYALAEAK<b>SQLAQSTFEK</b>LLTFVKQEGGLEYSANSTVNNEELNRFINWRPRLQARPIDILIT<br/>         SYAILTYSPLGR<b>LDEALPSVR</b>WLTQLKNAQGGFVSTQDQTVVGLQALSTYGSKFRPDTNITYVSDMNT<br/>         LTMNVKSDNALSLQIQEIQNSQDFSITASGSLALLDIEYSFNVKELSKPVFDVNTVLLDDKLDLDFNI<br/>         MVCTKFLMKHDTGMVVQELVSIPIPSGFVDPDLSTLGQVAGVKRSEKSGSIVAIYFDKISGSSLCYSIVMTREA<br/>         KVAKSQKSYVRTYDYYEPANQATVFYQPRTLRDSTVCDVCLNCCP</p> |

|                                                                                                                                                                                                                                                                                                                                                                              |                                                                                                                                                                                                                                                                                                                                                        |                                                                                                                                                                                                                                                                                                                                                                                                                                                                                                                                                                                                                                                                                                                                                                                                                                                                                                                                                                                                                                                                                                                                                                                                                                                                                                                                                                                                                                                                                                                       |
|------------------------------------------------------------------------------------------------------------------------------------------------------------------------------------------------------------------------------------------------------------------------------------------------------------------------------------------------------------------------------|--------------------------------------------------------------------------------------------------------------------------------------------------------------------------------------------------------------------------------------------------------------------------------------------------------------------------------------------------------|-----------------------------------------------------------------------------------------------------------------------------------------------------------------------------------------------------------------------------------------------------------------------------------------------------------------------------------------------------------------------------------------------------------------------------------------------------------------------------------------------------------------------------------------------------------------------------------------------------------------------------------------------------------------------------------------------------------------------------------------------------------------------------------------------------------------------------------------------------------------------------------------------------------------------------------------------------------------------------------------------------------------------------------------------------------------------------------------------------------------------------------------------------------------------------------------------------------------------------------------------------------------------------------------------------------------------------------------------------------------------------------------------------------------------------------------------------------------------------------------------------------------------|
|                                                                                                                                                                                                                                                                                                                                                                              | 828-903;<br>LGUN_random_Scaffold7766:<br>277-407;<br>LGUN_random_Scaffold53075:<br>386-529;<br>LGUN_random_Scaffold6063:<br>31434-31613; 29915-29997;<br>25214-25375; 23259-23332;<br>LGUN_random_Scaffold7260:<br>8533-8740; 5514-5738; 11544-<br>11696; 11926-11989; 12187-<br>12304; 13837-13988; 15855-<br>15963; 16394-16478                      |                                                                                                                                                                                                                                                                                                                                                                                                                                                                                                                                                                                                                                                                                                                                                                                                                                                                                                                                                                                                                                                                                                                                                                                                                                                                                                                                                                                                                                                                                                                       |
| <p><b>PREDICTED: CD109 antigen-like</b><br/>       [<i>Biomphalaria glabrata</i>] (100%);<br/>       Sequence ID: XP_013071291.1</p> <p><u>Domains:</u><br/>       -Proteinase-binding alpha-<br/>       macroglobulins: 47-138/ 348-500/<br/>       649-740/ 918-1168<br/>       -Thiol ester: 869-898<br/>       -Alpha-2-macroglobulin-receptor:<br/>       1271-1355</p> | LGUN_random_Scaffold108:<br>84237-84416; 83387-83461;<br>82641-82779; 80795-80861;<br>78882-79106; 78232-78463;<br>76389-76589; 76048-76202;<br>75142-75294; 51880-52111;<br>41664-41787; 35799-36007;<br>39854-39999; 39487-39666;<br>39487-39666; 39487-39666;<br>38763-38921; 36931-37116;<br>35799-36007; 34930-35082;<br>32766-32916; 31828-32071 | MESLHFLFYSQLPADLPSSSTYTLNVKGSGLTFDKSENLYNNKETSVFIQLNKAIFKPGDVTNFRVFGV<br>YSDLKSYTDPIDISYDANSNKIKQWLKVTPTNGVITQELTSTQPVLGDWVKISVDAGRTKEEKVFTVAE<br>YVLPKFEVDVVTPSYALTTDNDVTVTVKSKYTYGKPVNGTADVLVKLHESFNTFDYSRALPVTTLQVPLN<br><b>GEAK</b> VIIIPMSQVKAISANLNQHVLIVIANVTESLTGNQMSGNGTVTLYDKGVKLDFFASNPKTFKPALQY<br>IAYLK <b>VTQPDGLPMTSTAEQVK</b> SIRVTAELPGTTPPYWYVPPTESRDLPALSLAIPDNGLVAIPVDV<br>PADAKDVHVTANFQGVSKELTLGKSHSPNSYIQLILKSGSVIKFQLSRGGIVKTGTVDANGQLVYQFS<br>IPSDSSMAPNARIVLYVRADGEIVTDSISFDISGAFKNKVSIDLKTDVEPGDDVTVTKADPDSTAYC<br>LAIDQSVLLLKGGNDVTDNDVYTELKEYDTITESGSNKGIIDCPMCKRRKRMIWWPFPTYGGSDAQQIF<br>SNAGVVVLTDATVYHYQEPIHLFNIPNFFQCGRSLNQLRKRCFASFSPVMNLVSSVSDPITLPVTETE<br>TKTEDLQPTKTRSNFVETWLNWNSLDIGANGSASITATVPDTITSWVASAFAINSASGLGVAPTQAHLRV<br>FRPFFVSLNLPYSVTRGEHLALQANVFNYMTEDMQVRVTLAKSDNFFNIEIDANGAEVLKQVESVQDVMI<br>KAGEAKSVYFPIVPADLGKIDIEVKAQSTKAADAVRRQLLVEAEGVPKIYNVPLIDLTEGKTSFSKTVD<br>LTLPSNTVKGSELARISAVGDLMGPTIAGLDSLLQMPTGCGEQTMIGLAPDVYVTDYLK <b>SVNQLSGDIQT</b><br><b>K</b> ALSVMESGYQRELYKHTDGSFSAFGNSDASGSMWLTAFAVTRVFKQAKAHYIDDEVLIKAIQWMVSKQ<br>NANGSFPEPGNVIHKNMQGQAGSGVGLTLFVLISLLENKDLLVNTNAAGILVDEARQKALVYAEQEVAKT<br>DDLYILNMAAYAFQLANSSQVQTVLSKLEQKATVKDGRKYWHQPEQKTTNTWDYPNPTKAVDIEMTSYA<br>LLTYAARGNIVAGKSIMQWLTEQRNSNGGFSSTQDTVLALNALSEFAKQTYSNFNVQITTLNATTSYT<br>FNIDKTNSLLLQSRTPNVPSQVKIDATGSGMALVQVAVSFNVESEIFETFDLTVKLIETINNLVET<br>CAKWLGSQPSSAMAVQEIGIPSGFEADIESIPQLDILKRIETQNKVILYFDQIGTTPVCLNFRAVRTGL<br>VAKSQPAAIRVYDYEPNQTAFYQSQILKDDSTVCDVCKECDNCV |

|                                                                                                                                                                                                        |                                                                                                                                                                        |                                                                                                                                                                                                                                                                                                                                                                                                                                                                                                                                                                                                                                                                                              |
|--------------------------------------------------------------------------------------------------------------------------------------------------------------------------------------------------------|------------------------------------------------------------------------------------------------------------------------------------------------------------------------|----------------------------------------------------------------------------------------------------------------------------------------------------------------------------------------------------------------------------------------------------------------------------------------------------------------------------------------------------------------------------------------------------------------------------------------------------------------------------------------------------------------------------------------------------------------------------------------------------------------------------------------------------------------------------------------------|
| <p><b>PREDICTED: complement C4-like</b> (LOC106078805), [<i>Biomphalaria glabrata</i>] (100%);<br/>Sequence ID: XP_013095289</p> <p><u>Domains:</u><br/>-Alpha-2-macroglobulin-receptor: 12-96</p>     | <p>LGUN_random_Scaffold6063: 21546-21671; 19546-19697; 18165-18273; 17575-17738 /<br/>LGUN_random_Scaffold7260: 12179-12304; 13837-13988; 15855-15963; 16394-16557</p> | <p>MVCTKFLK<b>HDTGMVVQELSI</b>PSGFV<b>PD</b>STL<b>GQVAGVK</b>RSERKGSIVAIYFDKISGSSLCYSIVMTREA<br/>KVAKSQKSYVR<b>TYDYYEPANQATVFYQ</b>PRTL<b>RD</b>STV<b>CDVCPNCCP</b></p>                                                                                                                                                                                                                                                                                                                                                                                                                                                                                                                      |
| <p><b>Biomphalysin</b> [<i>Biomphalaria glabrata</i>] (100%);<br/>Sequence ID: AGG38744.1</p> <p><u>Domains:</u><br/>-Signal peptide: 1-17<br/>-Aerolysin: 195-531</p>                                 | <p>LGUN_random_Scaffold10:1097564:1099282: BGLB000137</p>                                                                                                              | <p>MFLQIFVAVTLVQYVSSQCTYSSWWYFDPGQSKCNEINSYINALDRNDVNWADDALSNLEGVQCCRPP<br/>APWNNVEQQVYEDWTATLDSYTWAFCRVGYFLQGLYRSDTGWPR<b>FKGYLFNLES</b>ARCTK<b>PAN</b>HPLNYG<br/>TCQDIDVSSCMGRKGQCSCPGGYFLTGLYRADGDDLYFLKKIRCCTPAAPLEMDEKSKIQTRIMDTTLW<br/>NMATLAHYMGYGCYCHGLAVGEDFTRNGFTWAADTRTFWGKWCEGDKNGERLNLVFGDWGFVAVKEIY<br/>GKSVIEDLQAESVDSGLVLYNR<b>ASSPV</b>TESIER<b>SK</b>TIQETITHSTTSTFTNSHGLGVELEFEIASVKGKAS<br/>YKTRFEYSTSTTNSKSISETQGFTKQSSITLGPMEGAKYEVIMSKSRRTVPYTAIITTKFSTEMKGFLRW<br/>EDGNGNFHQDYRTNSGRPTFN<b>YRFGDSSV</b>PFYKALKKQSDNNEGVMMWGMFLQKFPDARRVTNRLTDE<b>TQ</b><br/>YQFTLAGKLEKVEGTSVNVKWEKMKLNRRDVS<b>GNDE</b>PGSNITTYAASGPADKPAVVEYPKVNLNNKE<b>PF</b><br/>KPIEIPVTEVKV</p> |
| <p><b>Dermatopontin 2</b> [<i>Biomphalaria glabrata</i>]; (100%); Sequence ID: AAZ80786</p> <p><u>Domains:</u><br/>-Dermatopontin: 11-156</p>                                                          | <p>LGUN_random_Scaffold8114: 1204:2972: BGLB013420</p>                                                                                                                 | <p>MASVASAAYVNDWDQPFNFR<b>CPDGQVVS</b>YVSS<b>IHNNR</b>REDRRWFLCRSTR<b>QTHSCTDS</b>GYV<b>NDFD</b>GPLV<br/><b>YTCPGNK</b>VMGVHSHNNRREDRR<b>FGFYCCD</b>VQ<b>GSTPR</b>DCYTTNYVNDWDEK<b>LTLV</b>VEGTAV<b>KAA</b>YSHH<br/>DNRREDRR<b>WQFQICTL</b></p>                                                                                                                                                                                                                                                                                                                                                                                                                                              |
| <p><b>PREDICTED: Millepora cytotoxin-1-like</b> [<i>Biomphalaria glabrata</i>] (100%);<br/>Sequence ID: XP_013061974.1</p> <p><u>Domains:</u><br/>-Signal peptide: 1-24<br/>-Dermatopontin: 29-174</p> | <p>LGUN_random_Scaffold7789: 3993-4096, 5800-6107, 8666-9418</p>                                                                                                       | <p>MPRMYERYISIVLCSLLVNTVHCVTYQTEEQEDWTVFCAPNHVITDIVSDFFFS<b>DRLWNIT</b>CAPIR<b>PKI</b><br/>NITECVWSNYHNAPQYDFLDCPMNSILAGISSFHRSRDRV<b>FKYCCTNKDYL</b>VHAC<b>QHTLTINNAK</b>GFI<br/><b>SFRVPEAM</b>YV<b>RGLFSSYD</b>STAG<b>DR</b>LYRIHLCKLDPADPTVECPTELT<b>TQAVTKLVNQTETPL</b>ESESED</p>                                                                                                                                                                                                                                                                                                                                                                                                       |
| <p><b>PREDICTED: uncharacterized protein LOC106068782</b> [<i>Biomphalaria glabrata</i>] (100%);<br/>Sequence ID: XP_013083706.1</p> <p><u>Domains:</u></p>                                            | <p>LGUN_random_Scaffold286: 44298-44384; 42897-42974; 39464-39607; 36011-36117; 34918-35050; 34015-34151; 32322-32458; 31272-31438; 29557-29654; 27862-28646</p>       | <p>MVRRIAVLLCLSILVMTSSCQVQNLVAEYVVVVEDSTVQSYAQSSPAQTIAEATNSLRNDIDL<b>VITQTN</b><br/>VLLSSLVQYGINIEVRKRKVDILSTNIINTFLLETTYIADSSAAKASFQSWLNLQNA<b>YSTL</b>NYDFAVLWT<br/>GFDLFGTSGIFENSITSFAAMCK<b>STGVS</b>ME<b>FDP</b>TAR<b>DI</b>VATAKIIAYLLSSLNDG<b>ITSTY</b>IMAIINAPD<br/>DANRWFYNSSAQSIKEFVALPRASCLLSTNSASVKPAV<b>TYATYT</b>GSLLDPVICRSLNDSRSY<b>MCKSL</b><br/>PQIYNNQPPKGN<b>AVCSQI</b>YCRIPKTSICTPAFTSDGMICENQK<b>RCTK</b>QCSSYPTSPVDPNCLWGDQ<b>KTL</b><br/>DYPLIPFGTCKPFLDTYGAANCYTRPINETCCNTCKTYNSGIPGCEYGD<b>KSSACV</b>LFTQAQ<b>VCPI</b>YKNT</p>                                                                                                                                     |

|                                                                                                                                                                                                                                                                                                                                                                    |                                                                                                                                                                         |                                                                                                                                                                                                                                                                                                                                                                                                                                                                                                                                                                              |
|--------------------------------------------------------------------------------------------------------------------------------------------------------------------------------------------------------------------------------------------------------------------------------------------------------------------------------------------------------------------|-------------------------------------------------------------------------------------------------------------------------------------------------------------------------|------------------------------------------------------------------------------------------------------------------------------------------------------------------------------------------------------------------------------------------------------------------------------------------------------------------------------------------------------------------------------------------------------------------------------------------------------------------------------------------------------------------------------------------------------------------------------|
| <p>-Signal peptide : 1-20<br/>-Zn-dependent metalloprotease,<br/>ADAM- or reprolysin-like subgroup:<br/>31-228</p> <p><b>PREDICTED: ADAM family mig-17-like isoform X2</b> [<i>Biomphalaria glabrata</i>] (42%); Sequence ID: XP_013069827.1</p>                                                                                                                   |                                                                                                                                                                         | LCCNYCRNYVGRRSVPEGGYPELTPSPQQNVTEVPVVDYLGKRR                                                                                                                                                                                                                                                                                                                                                                                                                                                                                                                                 |
| <p><b>PREDICTED: uncharacterized protein LOC106068784</b> [<i>Biomphalaria glabrata</i>] (100%); Sequence ID: XP_013083707.1</p> <p><u>Domains:</u><br/>-Signal peptide: 1-21<br/>-Disintegrin and metalloproteinase:<br/>90-333</p> <p><b>PREDICTED: ADAM family mig-17-like isoform X2</b> [<i>Biomphalaria glabrata</i>] (44%); Sequence ID: XP_013069827.1</p> | <p>LGUN_random_Scaffold286:<br/>70002-70112; 67477-67586;<br/>65313-65458; 63714-63819;<br/>62425-62557; 60967-61102;<br/>60466-60602; 58410-58575;<br/>53454-54138</p> | <p>MWSPAVILCFALLVLTKSCQGQTYVLEAYIVADDSAVQNQVREIATTESYSVKYTKAVANLRKDIDYIVT<br/>QVNVLLGSLSQNGVTMEMRIRRLDILSGNIITTFMPGTSYVVDSIVARNSFQNLNLQAYANINYDFAL<br/>LWTGFNLYGTSGLADNSITNVAQMCGAAGITVVEFDPTAREAVATAR<b>AIGNLLGASNDGALSTSIMAIIN</b><br/><b>APGDVNR</b>WSYSTCSASSIKDFIKLPKASCLLTTNIAS TKPSVTFSSYTG NLFDPDIICQRALNDSRTYMC<br/>KSLPQIYNLLPK<b>GNAVCGQIFCRIPNTMTCTPVYTS</b>DGLVCDN<b>QKRCSL</b>QCSSYST<b>TPVVD</b>TNCV<b>FGDQ</b><br/><b>K</b>KLEFPVAVPFYGTCCQAFISQYGAVNCYSSPINESCCSTCKSYNNGRVGCEYGDRSLDCVKYTKASICPTY<br/>KNTLCCGYCYNVVGKRSPSDEPVPKLNITLPKIIGQEPDIMPFEFNSQP</p> |
| <p><b>PREDICTED: Serpin B6-like protein</b> [<i>Biomphalaria glabrata</i>] (100%); Sequence ID: XP_013077880.1</p> <p><u>Domains:</u><br/>-Signal peptide: 1-27<br/>-Low complexity: 50-61/ 63-76<br/>Serp: 92-458</p>                                                                                                                                             | <p>LGUN_random_Scaffold1827:<br/>27197-27439; 31889-32190;<br/>39463-40100; 39670-40571;<br/>39564-40002</p>                                                            | <p>MNTRSRLVLLVFLVLLAVIALTKRADAGDEQELSAAKNEISRYRRTLLSRNRGGNRDRDNRTKQGKKKGN<br/>NSKKQKLSPEERIGVANSHVALNVFTSLYPSINSNTIFSPHSLHTALAMTMLGAKKDTKKEFYISLGLKA<br/>AKVGKSEVHGIYKLLQSLSSRPDIILSYANSVYVKSGLELKKKFRGLTTHYHAKVDNFMNDPEGPER<br/>SINAWVANATRKGKISDILKKGVDNINTAMIIINAVYLNASWAIQFQTFNTKPKPFYSLNSGVQTIPTMHI<br/>VQFYNYANHHDETEIENLNFNGSQLAMYILLPSAK<b>SNLNQLLQNMK</b>ASSALANPFDELLTGLERRNLNLSL<br/>PTFK<b>IQSDVIDLVPALK</b>NLGLKAFNSSQADFKGIAKQKFLDKVVIQKAVISVNETGCEAAAATDVIFGL<br/>KSSRPTPALEV<b>KVDRPFLYVIR</b>SKAQKVVLFMGTFFGV</p>                                           |

|                                                                                                                                                                                                                                                                                                                         |                                                                                                                  |                                                                                                                                                                                                                                                                                                                                                                                                                                                                                                                                                                          |
|-------------------------------------------------------------------------------------------------------------------------------------------------------------------------------------------------------------------------------------------------------------------------------------------------------------------------|------------------------------------------------------------------------------------------------------------------|--------------------------------------------------------------------------------------------------------------------------------------------------------------------------------------------------------------------------------------------------------------------------------------------------------------------------------------------------------------------------------------------------------------------------------------------------------------------------------------------------------------------------------------------------------------------------|
| <p><b>PREDICTED: neo-calmodulin-like protein</b> [<i>Biomphalaria glabrata</i>] (100%); Sequence ID: XP_013067017.1</p> <p><u>Domains:</u><br/>- EF-hand, calcium binding motifs: 12-40, 48-76/ 85-113/ 121-150</p>                                                                                                     | <p>LG27_random_Scaffold161: 16903:18554 :BGLB001498</p>                                                          | <p>MAEQLTEETIAEFKEAFSLFDKGDGDTITTKELGTVMRSLGQNPTEAELQDMINEVDADGNGTIDFPEFL<br/>TMMARKMKDTEEELREAFRVFDKDGNGFISAAELRHVMTNLGEKLTDEEVDDEMIREADTDGGQVNYD<br/>GECHSASYHMLLHLPRGFHPPQRSS</p>                                                                                                                                                                                                                                                                                                                                                                                     |
| <p><b>PREDICTED: GATA zinc finger domain-containing protein</b> [<i>Biomphalaria glabrata</i>] (100%); Sequence ID: XP_013076718.1</p> <p><u>Domains:</u><br/>-Signal peptide: 1-25<br/>-Cu-Zn SOD : 352-497</p> <p><b>Superoxide dismutase (Cu-Zn)</b> [<i>Megathura crenulata</i>] (40%); Sequence ID: CAF22060.1</p> | <p>LGUN_random_Scaffold1689: 27317 -27807; 36361 -36477; 37754-38211; 52024-52107; 66296-66541; 76688 -76877</p> | <p>MKPMQMFNLRVLFVSVILVILSVHCQKFSKKGKHLNEQYKPNLIKIKENKFINIGGNVSLNDTIEQNITSE<br/>ETQDNKENMNETISLKTVNAKENVTSVETQTMTSQIEFLNASNHISDLDIVNITQDETLNSSESYKKPS<br/>TSCDCHVHLLMDKLLKDLSSMRTYVKERHNPIQIHIYKGEKIKSSQMSEPSKDNDKELGKGTQDQSKS<br/>YSKQLNKNDLQDQHVHVHSGNLRHNHNSKYNHIHSLNNQDLRRNYQNGHSNVKYPKNTKFHNQITHD<br/>HYEPSVSRQRHFVKQETHIHLNIQVSGRNEEDAKEKERHKMSVEQIKKEGLLEKDLTAKNEIPIFARCDM<br/>KTYNSGHNISGTVFLHQLPGQYLKVEVQLHGFVQSNHRSTDIKEEKQFLNLSNDISLNKQLHGFHVHE<br/>FGDSSKGCCHSMGGHFNPEGVHHGYRNNSHGHVGDWGNIDVDMYGDSNSNFTVQAASLIGPNSILGRGIVV<br/>SLHAITHKELLECEKVDVDFG</p>      |
| <p><b>PREDICTED: uncharacterized protein LOC106059379</b> [<i>Biomphalaria glabrata</i>] (100%); Sequence ID: XP_013072448.1</p> <p><u>Domains:</u><br/>-Copper type II, ascorbate-dependent monooxygenase: 1-100</p>                                                                                                   | <p>LGUN_random_Scaffold1196: 16772-16869; 15959-16119; 14884-15048; 11587-12745</p>                              | <p>MSIQLYRNKVLINLTNDELYNLDAPVTHYPKQHVQILPGDEIITRCVYNTTSAATSDPSGQVQGEMCYG<br/>YLNVPQASALRIPDGTCAVSTSLYCERSQSIPVDGCDWKTFLSYGDLELIDMYCQLRSSCQLQGSKRV<br/>QSSQNNASSPSHDFSSILSIDDTSISMKSNVTDGRVSKGSTDNISATQNNNTDFNSQSIPSDNSIVPN<br/>ISLFDVNTQNTTYSSSLIEANTTSVNHASLADASIVKILSSDSIGNINSQVENYFNETIKHFAGKMSVN<br/>QTASNDLDLLETQRDQTTSNITSTAHLGGVQLNATLSAKDKVAETRNSSNGLTSTYHNSDTGHISTTHI<br/>NNKGQISSTVLDLGHVSTSFIDSNGAICTVYIDSNVSTSYNDGNGRVSTTHIDRKGQISTHLDSDG<br/>HISISRIDSKGLVSTIRTDKGRNSKRDDTSVEVGSYTYGDSIGHVEPKPSVRDNETASQSLELSFNPKD<br/>IFHNKAISVHKVACYLSFYMCILQVIIVTLRL</p> |
