# Supplementary material for: Proteomic analysis of Biomphalaria glabrata plasma proteins with binding affinity to those expressed by early developing larval Schistosoma mansoni
Source: PubMed Central journal article supplement (PMC5433772; doi:10.1371/journal.ppat.1006081), 2017-05-16
Supplement: ppat.1006081.s008.pdf [file ppat.1006081.s008.pdf]

**S7 Table. PCR primer sequences used to amplify transcripts encoding FREP12, GREP, CREP2, and ADAM-TS from *Biomphalaria glabrata* whole body extracts.**

| <b>Primer</b> | <b>Forward (5'-3')</b>    | <b>Reverse (5'-3')</b>    | <b>Amplicon size (bp)</b> | <b>Tm (°C)</b> |
|---------------|---------------------------|---------------------------|---------------------------|----------------|
| Alpha-actinin | GGATTCGTCGTA TAGACCTTGGTT | TGCTTGACTTCTCCCCATTTGTT   | 897                       | 53             |
| GREP          | CCAGAGTTCAGTTCTGTCAAAATG  | GAGGCTTAGCTCATGAAGA ACTAT | 1835                      | 53             |
| CREP2         | TCGGGAACTAGATCTAGGTTCAAG  | GGTG TTCACACATGTAATGGTTAG | 977                       | 52             |
| ADAM-TS       | TACGTGACATACCCGGATCA      | CAAGCCTTACGTACCTGTACTC    | 977                       | 52             |
| BgFREP12      | CGGTGGATGGATCATCTTTCA     | TGCACAGTTTAAAGTACTGTCT    | 358                       | 52             |
